# Supplementary material for: The subgenomes show asymmetric expression of alleles in hybrid lineages of Megalobrama amblycephala × Culter alburnus
Source: HighWire-hosted journal article supplement (doi:10.1101/gr.249805.119), 2019-10-24
Supplement: Supplemental_Figures_zip.zip [file Supplemental_Fig_S1.pdf › Supplemental_Figures/Supplemental_Fig_S1.pdf]

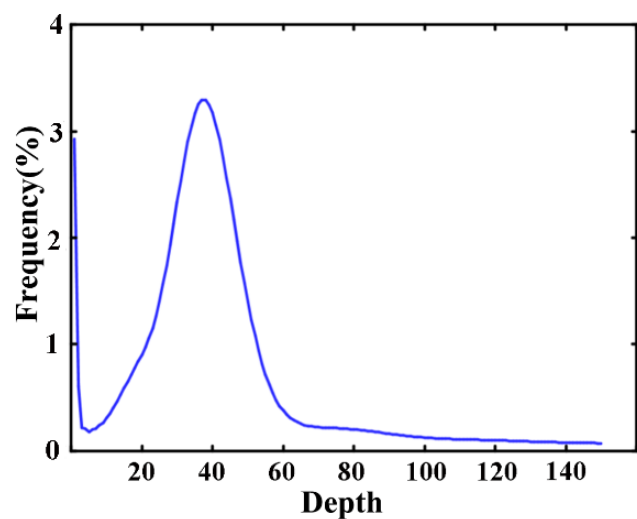

*Megalobrama amblycephala*

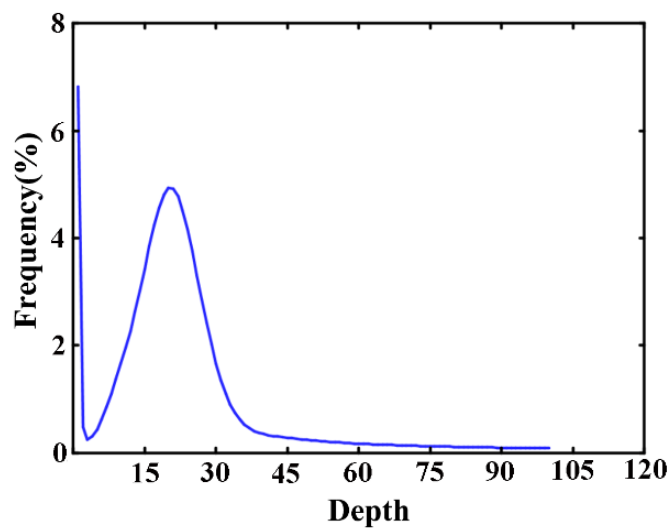

*Culter alburnus*

**Supplemental Fig. S1.** The distribution from 21-mer depth analysis based on BSB and TC whole-genome sequencing data.
