# Supplementary material for: The subgenomes show asymmetric expression of alleles in hybrid lineages of Megalobrama amblycephala × Culter alburnus
Source: HighWire-hosted journal article supplement (doi:10.1101/gr.249805.119), 2019-10-24
Supplement: Supplemental_Figures_zip.zip [file Supplemental_Fig_S3.pdf › Supplemental_Figures/Supplemental_Fig_S3.pdf]

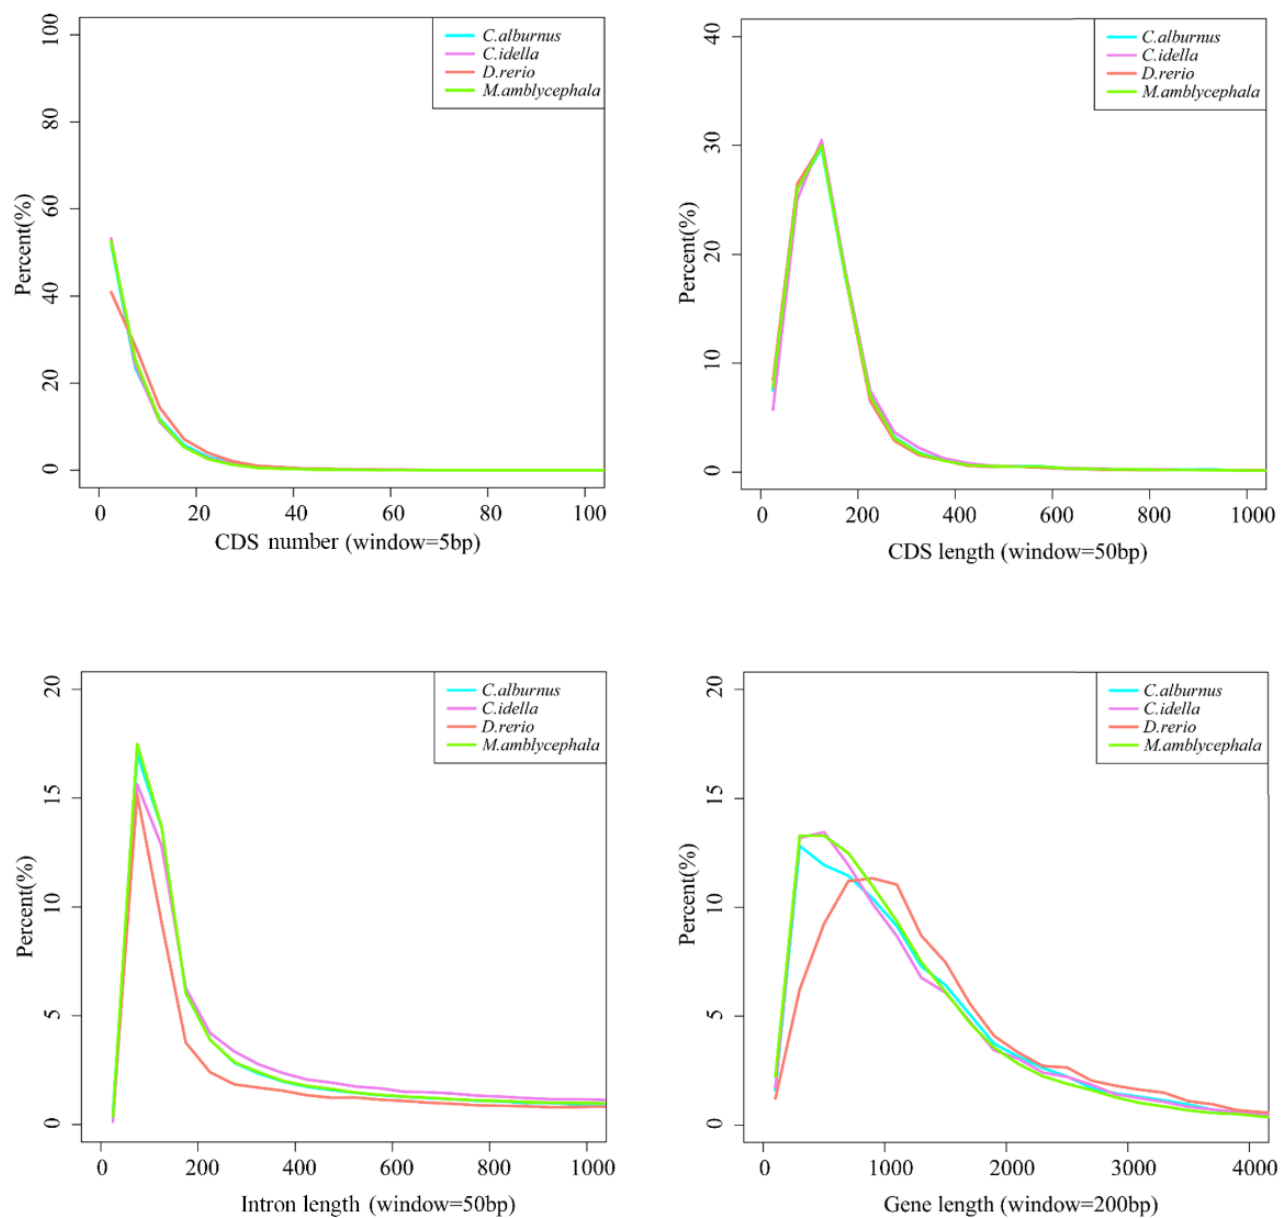

**Supplemental Fig. S3.** Comparison of gene parameters among four Cyprinid fish genomes. No obvious differences were observed between BSB and TC, indicating the high quality of the gene structure annotation.
