# Supplementary material for: The subgenomes show asymmetric expression of alleles in hybrid lineages of Megalobrama amblycephala × Culter alburnus
Source: HighWire-hosted journal article supplement (doi:10.1101/gr.249805.119), 2019-10-24
Supplement: Supplemental_Figures_zip.zip [file Supplemental_Fig_S5.pdf › Supplemental_Figures/Supplemental_Fig_S5.pdf]

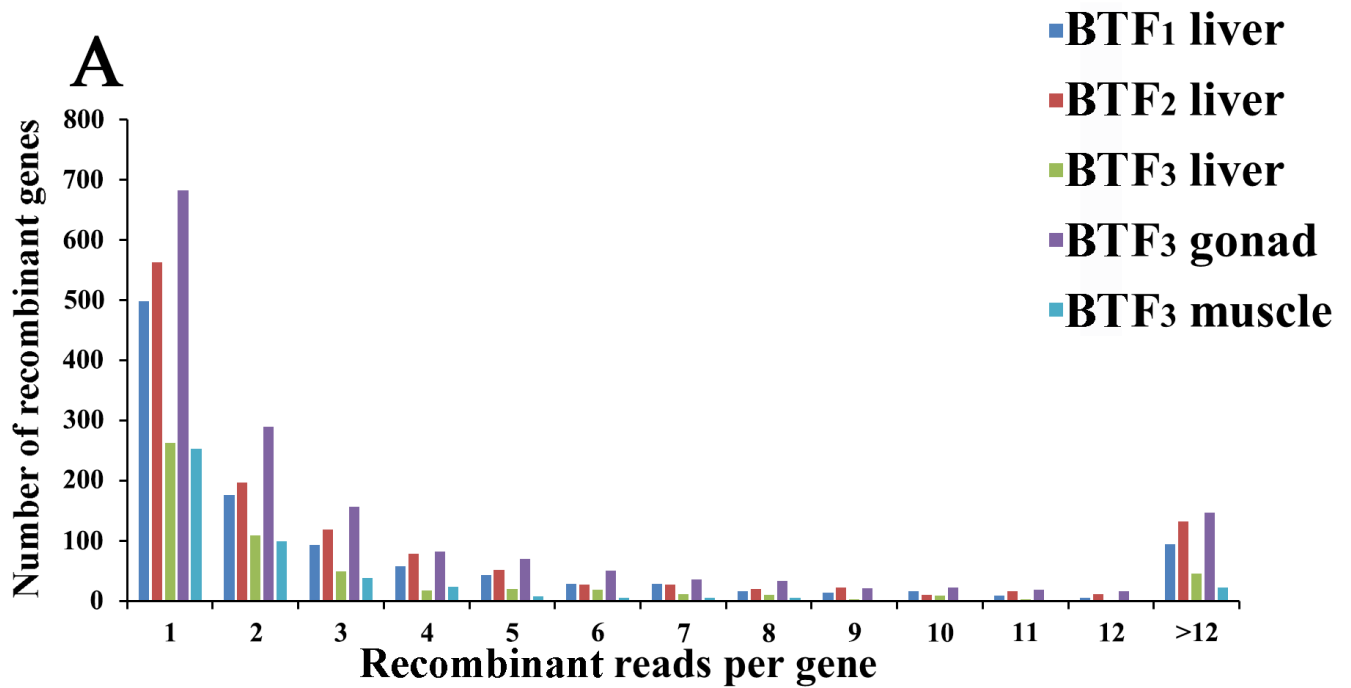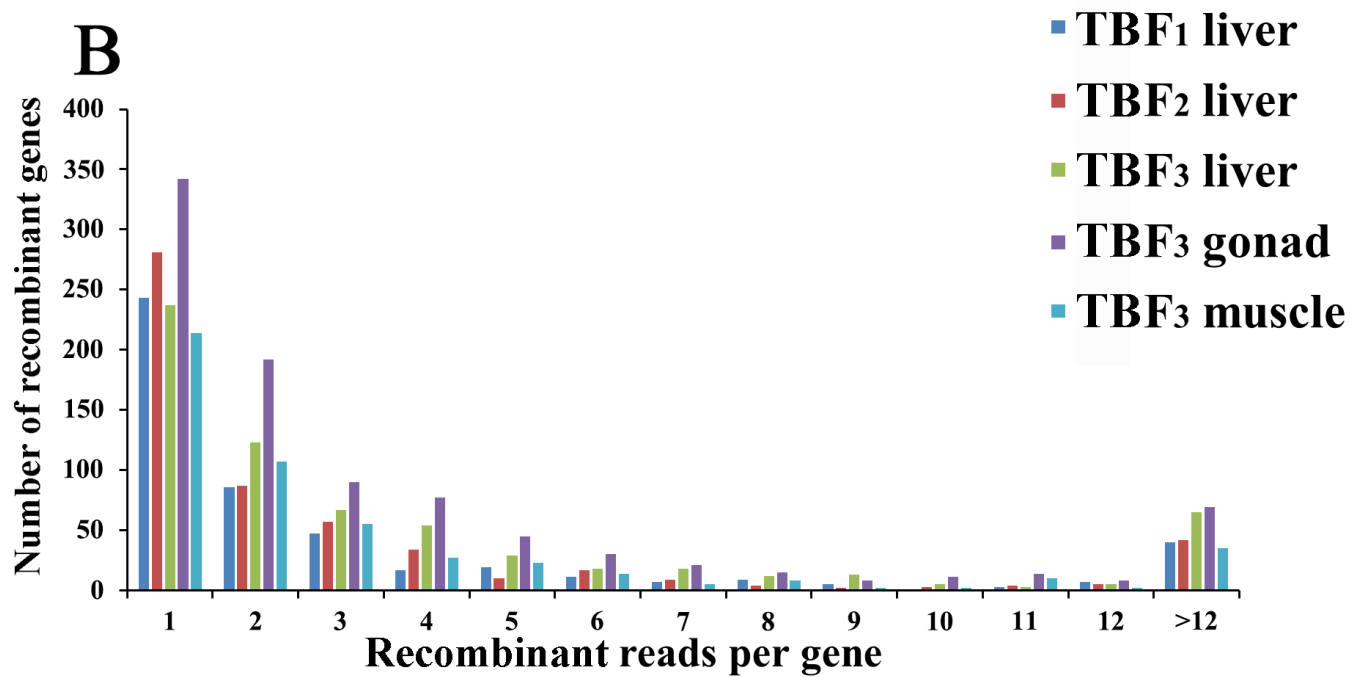

**Supplemental Fig. S5.** The number of recombinant reads in each gene detected by Illumina sequencing. (A) The distribution of recombinant reads in each gene of BT. (B) The distribution of recombinant reads in each gene of TB.
