# Supplementary material for: The subgenomes show asymmetric expression of alleles in hybrid lineages of Megalobrama amblycephala × Culter alburnus
Source: HighWire-hosted journal article supplement (doi:10.1101/gr.249805.119), 2019-10-24
Supplement: Supplemental_Figures_zip.zip [file Supplemental_Fig_S7.pdf › Supplemental_Figures/Supplemental_Fig_S7.pdf]

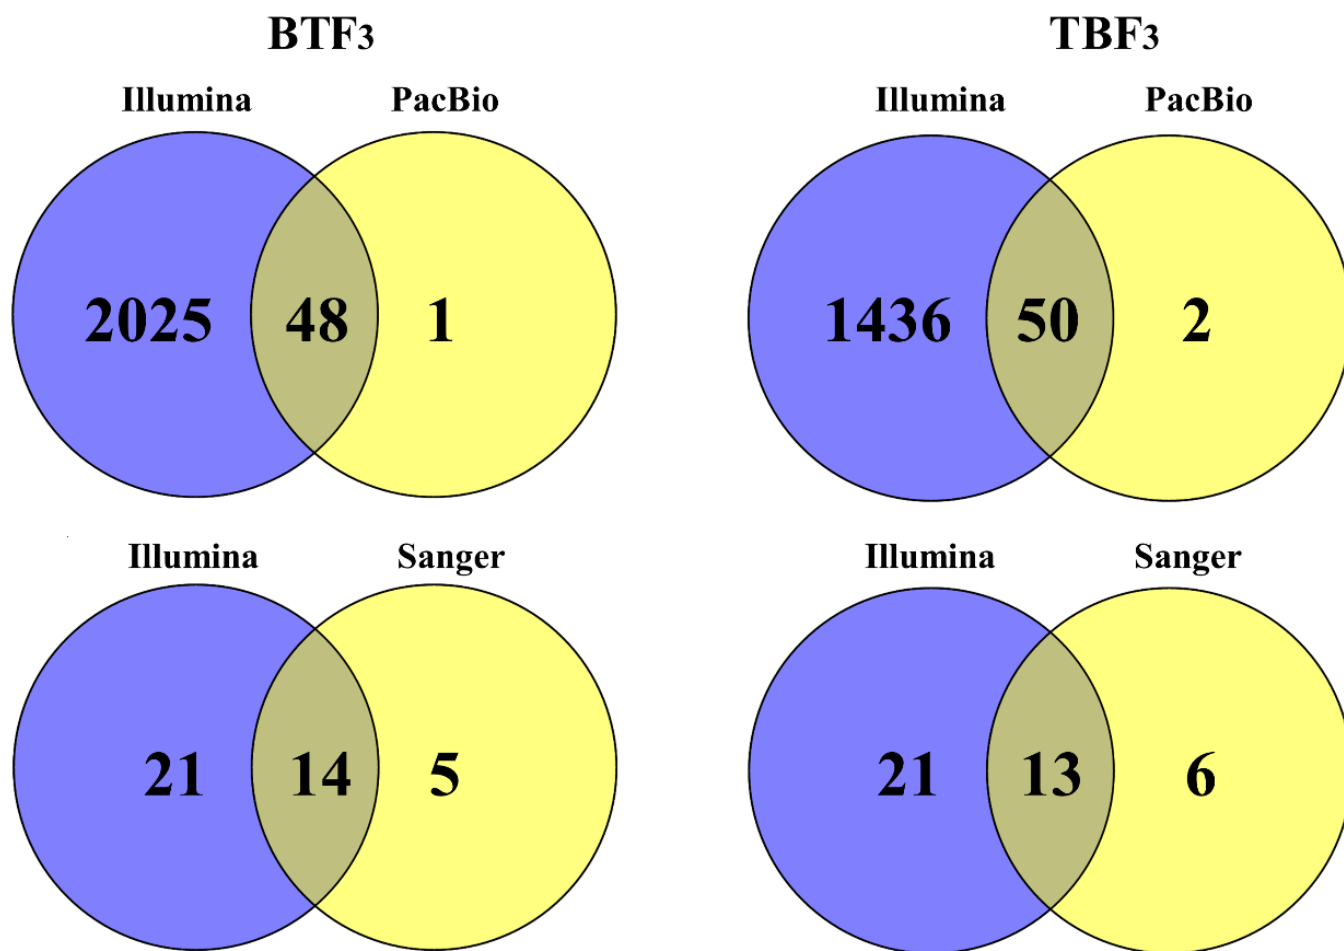

**Supplemental Fig. S7.** The distribution of allelic recombinant genes in F<sub>3</sub> of the two hybrid lineages detected by Illumina, PacBio and Sanger sequencing.
