# Supplementary material for: The subgenomes show asymmetric expression of alleles in hybrid lineages of Megalobrama amblycephala × Culter alburnus
Source: HighWire-hosted journal article supplement (doi:10.1101/gr.249805.119), 2019-10-24
Supplement: Supplemental_Figures_zip.zip [file Supplemental_Fig_S8.pdf › Supplemental_Figures/Supplemental_Fig_S8.pdf]

AGGATCGGAGATACAGT**TC**GAACCACTCACTGGAGTGGCTGAGGAGAGGCACAGCAGGCTGTCGTCACAGAGGAGGTCAAGTCACAGGAGGAGCG**TC**GGACGGGAAAGAGGTTGACAGCA**CG**GTGGAGAAGATGGACGGGGCAGCCGAG  
 AGCATCGAGATACAGT**CA**CTCAACCACTCACTGGAGTGGCTGAGGAGAGGCACAGCAGGCTGTCGTCACAGAGGAGGTCAAGTCACAGGAGGAGCGCTGGGACGGGAAAGAGGTTGACAGCA**CG**GTGGAGAAGATGGACGGGGCAGCCGAG  
 AGGATCGGAGATACAGT**TC**GAACCACTCACTGGAGTGGCTGAGGAGAGGCACAGCAGGCTGTCGTCACAGAGGAGGTCAAGTCACAGGAGGAGCG**TC**GGACGGGAAAGAGGTTGACAGCA**CG**GTGGAGAAGATGGACGGGGCAGCCGAG  
 AGGATCGGAGATACAGT**CA**CTCAACCACTCACTGGAGTGGCTGAGGAGAGGCACAGCAGGCTGTCGTCACAGAGGAGGTCAAGTCACAGGAGGAGCGCTGGGACGGGAAAGAGGTTGACAGCA**CG**GTGGAGAAGATGGACGGGGCAGCCGAG  
 AGGATCGGAGATACAGT**CA**CTCAACCACTCACTGGAGTGGCTGAGGAGAGGCACAGCAGGCTGTCGTCACAGAGGAGGTCAAGTCACAGGAGGAGCGCTGGGACGGGAAAGAGGTTGACAGCA**CG**GTGGAGAAGATGGACGGGGCAGCCGAG  
 AGGATCGGAGATACAGT**CA**CTCAACCACTCACTGGAGTGGCTGAGGAGAGGCACAGCAGGCTGTCGTCACAGAGGAGGTCAAGTCACAGGAGGAGCGCTGGGACGGGAAAGAGGTTGACAGCA**CG**GTGGAGAAGATGGACGGGGCAGCCGAG  
 AGGATCGGAGATACAGT**TC**GAACCACTCACTGGAGTGGCTGAGGAGAGGCACAGCAGGCTGTCGTCACAGAGGAGGTCAAGTCACAGGAGGAGCG**TC**GGACGGGAAAGAGGTTGACAGCA**CG**GTGGAGAAGATGGACGGGGCAGCCGAG



**Supplemental Fig. S8.** Diagram and alignment of *ACBD5* (DNA) from BSB, TC, and their reciprocal cross hybrids (BT and TB) in the F<sub>1</sub> and F<sub>3</sub> generation. (A) Schematic map of relationships between the reference genome and Sanger sequences. (B) Sequence alignment for *ACBD5*.
