# Supplementary material for: The subgenomes show asymmetric expression of alleles in hybrid lineages of Megalobrama amblycephala × Culter alburnus
Source: HighWire-hosted journal article supplement (doi:10.1101/gr.249805.119), 2019-10-24
Supplement: Supplemental_Figures_zip.zip [file Supplemental_Fig_S14.pdf › Supplemental_Figures/Supplemental_Fig_S14.pdf]

[illegible]

sequences. (B) Sequence alignment for *F10*.
