# Supplementary material for: The subgenomes show asymmetric expression of alleles in hybrid lineages of Megalobrama amblycephala × Culter alburnus
Source: HighWire-hosted journal article supplement (doi:10.1101/gr.249805.119), 2019-10-24
Supplement: Supplemental_Figures_zip.zip [file Supplemental_Fig_S25.pdf › Supplemental_Figures/Supplemental_Fig_S25.pdf]

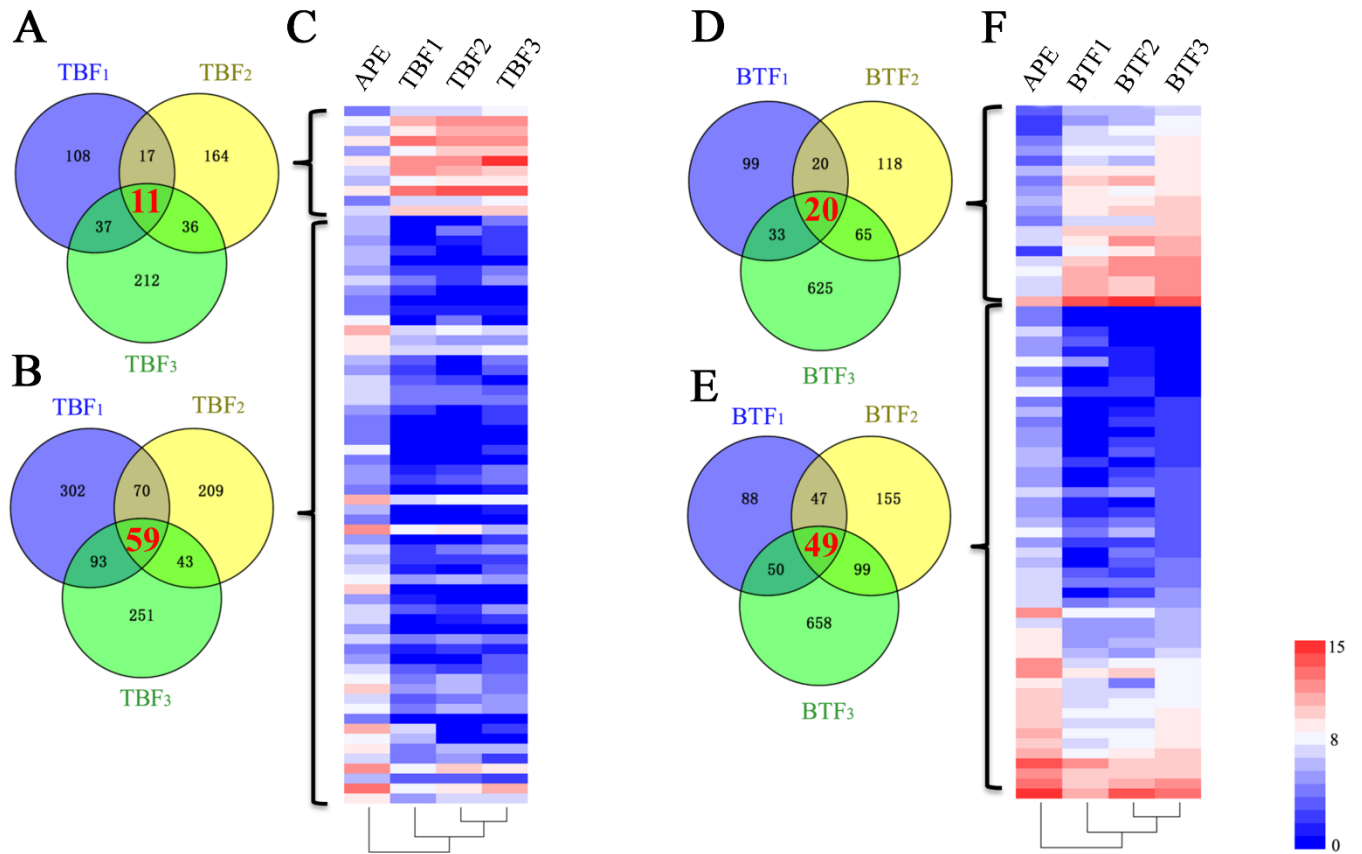

**Supplemental Fig. S25.** The distribution of DE genes in three generations of reciprocal cross hybrids (BT and TB) detected in liver tissue with RNA-seq, in comparison to the “average parental expression” (APE) and hybrid expression. (A) The share of upregulated genes in BT. (B) The share of downregulated genes in BT. (C) Heatmap depicting the DE of shared genes in three generations of BT. (D) The share of upregulated genes in TB. (E) The share of downregulated genes in TB. (F) Heatmap describing the DE of shared genes in three generations of TB.
