# Supplementary material for: The subgenomes show asymmetric expression of alleles in hybrid lineages of Megalobrama amblycephala × Culter alburnus
Source: HighWire-hosted journal article supplement (doi:10.1101/gr.249805.119), 2019-10-24
Supplement: Supplemental_Figures_zip.zip [file Supplemental_Fig_S26.pdf › Supplemental_Figures/Supplemental_Fig_S26.pdf]

| Categories               | Additive                                                                          |                                                                                   | TC expression level dominance                                                     |                                                                                   | BSB expression level dominance                                                    |                                                                                     | Transgressive down-regulation                                                       |                                                                                     |                                                                                     | Transgressive up-regulation                                                         |                                                                                     |                                                                                     | No Change  |
|--------------------------|-----------------------------------------------------------------------------------|-----------------------------------------------------------------------------------|-----------------------------------------------------------------------------------|-----------------------------------------------------------------------------------|-----------------------------------------------------------------------------------|-------------------------------------------------------------------------------------|-------------------------------------------------------------------------------------|-------------------------------------------------------------------------------------|-------------------------------------------------------------------------------------|-------------------------------------------------------------------------------------|-------------------------------------------------------------------------------------|-------------------------------------------------------------------------------------|------------|
|                          | I                                                                                 | XII                                                                               | II                                                                                | XI                                                                                | IV                                                                                | IX                                                                                  | III                                                                                 | VII                                                                                 | X                                                                                   | V                                                                                   | VI                                                                                  | VIII                                                                                |            |
|                          |  |  |  |  |  |  |  |  |  |  |  |  |            |
| <b>BTF<sub>1</sub>-L</b> | <b>864</b>                                                                        | <b>398</b>                                                                        | <b>1,135</b>                                                                      | <b>424</b>                                                                        | <b>423</b>                                                                        | <b>708</b>                                                                          | <b>254</b>                                                                          | <b>254</b>                                                                          | <b>259</b>                                                                          | <b>790</b>                                                                          | <b>293</b>                                                                          | <b>568</b>                                                                          | <b>935</b> |
| <b>BTF<sub>2</sub>-L</b> | <b>792</b>                                                                        | <b>387</b>                                                                        | <b>1,319</b>                                                                      | <b>332</b>                                                                        | <b>457</b>                                                                        | <b>474</b>                                                                          | <b>189</b>                                                                          | <b>159</b>                                                                          | <b>210</b>                                                                          | <b>1,044</b>                                                                        | <b>446</b>                                                                          | <b>869</b>                                                                          | <b>772</b> |
| <b>BTF<sub>3</sub>-L</b> | <b>410</b>                                                                        | <b>322</b>                                                                        | <b>820</b>                                                                        | <b>275</b>                                                                        | <b>340</b>                                                                        | <b>328</b>                                                                          | <b>171</b>                                                                          | <b>175</b>                                                                          | <b>212</b>                                                                          | <b>2,048</b>                                                                        | <b>665</b>                                                                          | <b>1,157</b>                                                                        | <b>556</b> |
| <b>Shared in BT-L</b>    | <b>133</b>                                                                        | <b>99</b>                                                                         | <b>105</b>                                                                        | <b>17</b>                                                                         | <b>24</b>                                                                         | <b>25</b>                                                                           | <b>36</b>                                                                           | <b>27</b>                                                                           | <b>31</b>                                                                           | <b>371</b>                                                                          | <b>98</b>                                                                           | <b>266</b>                                                                          | <b>65</b>  |
| <b>TBF<sub>1</sub>-L</b> | <b>784</b>                                                                        | <b>342</b>                                                                        | <b>863</b>                                                                        | <b>385</b>                                                                        | <b>292</b>                                                                        | <b>761</b>                                                                          | <b>375</b>                                                                          | <b>345</b>                                                                          | <b>376</b>                                                                          | <b>611</b>                                                                          | <b>256</b>                                                                          | <b>410</b>                                                                          | <b>757</b> |
| <b>TBF<sub>2</sub>-L</b> | <b>976</b>                                                                        | <b>364</b>                                                                        | <b>1,096</b>                                                                      | <b>332</b>                                                                        | <b>425</b>                                                                        | <b>770</b>                                                                          | <b>223</b>                                                                          | <b>191</b>                                                                          | <b>156</b>                                                                          | <b>697</b>                                                                          | <b>532</b>                                                                          | <b>690</b>                                                                          | <b>866</b> |
| <b>TBF<sub>3</sub>-L</b> | <b>398</b>                                                                        | <b>325</b>                                                                        | <b>1,114</b>                                                                      | <b>268</b>                                                                        | <b>385</b>                                                                        | <b>197</b>                                                                          | <b>83</b>                                                                           | <b>82</b>                                                                           | <b>175</b>                                                                          | <b>2,106</b>                                                                        | <b>647</b>                                                                          | <b>1,260</b>                                                                        | <b>554</b> |
| <b>Shared in TB-L</b>    | <b>120</b>                                                                        | <b>85</b>                                                                         | <b>82</b>                                                                         | <b>22</b>                                                                         | <b>20</b>                                                                         | <b>19</b>                                                                           | <b>23</b>                                                                           | <b>20</b>                                                                           | <b>30</b>                                                                           | <b>151</b>                                                                          | <b>100</b>                                                                          | <b>162</b>                                                                          | <b>60</b>  |
| <b>Shared in Liver</b>   | <b>38</b>                                                                         | <b>20</b>                                                                         | <b>4</b>                                                                          | <b>2</b>                                                                          | <b>1</b>                                                                          | <b>1</b>                                                                            | <b>9</b>                                                                            | <b>6</b>                                                                            | <b>6</b>                                                                            | <b>70</b>                                                                           | <b>37</b>                                                                           | <b>70</b>                                                                           | <b>6</b>   |

**Supplemental Fig. S26.** Partitioning of expression patterns in three generations of reciprocal cross hybrids (BT and TB), contrasting the BSB and TC genomes. The 12 expression patterns in BT and TB were classified based on relative gene expression between the hybrids and their diploid parents. The shared genes under different Roman numerals indicate the same categorization as used in Rapp et al. (2009). The symbol B represents the parental BSB, and the symbol T represents the parental TC. BSB/TC expression-level dominance and Transgressive up-/downregulation were classified as non-additive.
