# Supplementary material for: The subgenomes show asymmetric expression of alleles in hybrid lineages of Megalobrama amblycephala × Culter alburnus
Source: HighWire-hosted journal article supplement (doi:10.1101/gr.249805.119), 2019-10-24
Supplement: Supplemental_Figures_zip.zip [file Supplemental_Fig_S28.pdf › Supplemental_Figures/Supplemental_Fig_S28.pdf]

### TC-homoeolog silencing

|                |    |    |    |    |    |
|----------------|----|----|----|----|----|
| <b>BT-F1-L</b> | 12 |    |    |    | 12 |
| <b>BT-F2-L</b> | 9  |    |    |    | 9  |
| <b>BT-F3-L</b> | 12 | 12 |    |    | 12 |
| <b>BT-F3-G</b> |    | 14 |    |    |    |
| <b>BT-F3-M</b> |    | 14 |    |    |    |
| <b>TB-F1-L</b> |    |    | 7  |    | 7  |
| <b>TB-F2-L</b> |    |    | 10 |    | 10 |
| <b>TB-F3-L</b> |    |    | 14 | 14 | 14 |
| <b>TB-F3-G</b> |    |    |    | 16 |    |
| <b>TB-F3-M</b> |    |    |    | 13 |    |
| <b>Shared</b>  | 8  | 10 | 7  | 12 | 7  |

### BSB-homoeolog silencing

|                |   |   |   |   |   |
|----------------|---|---|---|---|---|
| <b>BT-F1-L</b> | 0 |   |   |   | 0 |
| <b>BT-F2-L</b> | 0 |   |   |   | 0 |
| <b>BT-F3-L</b> | 2 | 2 |   |   | 2 |
| <b>BT-F3-G</b> |   | 1 |   |   |   |
| <b>BT-F3-M</b> |   | 5 |   |   |   |
| <b>TB-F1-L</b> |   |   | 0 |   | 0 |
| <b>TB-F2-L</b> |   |   | 1 |   | 1 |
| <b>TB-F3-L</b> |   |   | 0 | 0 | 0 |
| <b>TB-F3-G</b> |   |   |   | 3 |   |
| <b>TB-F3-M</b> |   |   |   | 3 |   |
| <b>Shared</b>  | 0 | 0 | 0 | 0 | 0 |

**Supplemental Fig. S28.** The frequency of BSB and TC allelic silencing in three tissues (liver: L, gonad: G, and muscle: M) of reciprocal-cross hybrids (BT and TB) and the shared number in different categories, including only liver tissue in different generations and all tissues in the third generation.
