# Supplementary material for: The subgenomes show asymmetric expression of alleles in hybrid lineages of Megalobrama amblycephala × Culter alburnus
Source: HighWire-hosted journal article supplement (doi:10.1101/gr.249805.119), 2019-10-24
Supplement: Supplemental_Figures_zip.zip [file Supplemental_Fig_S30.pdf › Supplemental_Figures/Supplemental_Fig_S30.pdf]

## Overall BSB allelic expression bias

|               |     |     |     |     |     |
|---------------|-----|-----|-----|-----|-----|
| <b>BTF1-L</b> | 304 |     |     |     | 304 |
| <b>BTF2-L</b> | 265 |     |     |     | 265 |
| <b>BTF3-L</b> | 189 | 189 |     |     | 189 |
| <b>BTF3-G</b> |     | 215 |     |     |     |
| <b>BTF3-M</b> |     | 162 |     |     |     |
| <b>TBF1-L</b> |     |     | 454 |     | 454 |
| <b>TBF2-L</b> |     |     | 266 |     | 266 |
| <b>TBF3-L</b> |     |     | 154 | 154 | 154 |
| <b>TBF3-G</b> |     |     |     | 185 |     |
| <b>TBF3-M</b> |     |     |     | 182 |     |
| <b>Share</b>  | 82  | 71  | 77  | 74  | 29  |

## Overall TC allelic expression bias

|               |     |     |     |     |     |
|---------------|-----|-----|-----|-----|-----|
| <b>BTF1-L</b> | 165 |     |     |     | 165 |
| <b>BTF2-L</b> | 183 |     |     |     | 183 |
| <b>BTF3-L</b> | 177 | 177 |     |     | 177 |
| <b>BTF3-G</b> |     | 235 |     |     |     |
| <b>BTF3-M</b> |     | 168 |     |     |     |
| <b>TBF1-L</b> |     |     | 185 |     | 185 |
| <b>TBF2-L</b> |     |     | 187 |     | 187 |
| <b>TBF3-L</b> |     |     | 157 | 157 | 157 |
| <b>TBF3-G</b> |     |     |     | 202 |     |
| <b>TBF3-M</b> |     |     |     | 156 |     |
| <b>Share</b>  | 60  | 79  | 74  | 65  | 31  |

**Supplemental Fig. S30.** The number of genes with TC and BSB allelic expression bias in three tissues (liver: L, gonad: G, and muscle: M) of reciprocal cross hybrids (BT and TB). The alleles with significant differential expression between TC and BSB, with  $\log_2 |\text{TC/BSB}| > 0$  as the threshold ( $P < 0.05$  in comparisons; Fisher's exact test), and the shared number for different categories, including only liver tissue in different generations and all tissues in the third generation ( $P < 0.05$  in comparisons; Fisher's exact test).
