# Supplementary material for: The subgenomes show asymmetric expression of alleles in hybrid lineages of Megalobrama amblycephala × Culter alburnus
Source: HighWire-hosted journal article supplement (doi:10.1101/gr.249805.119), 2019-10-24
Supplement: Supplemental_Figures_zip.zip [file Supplemental_Fig_S31.pdf › Supplemental_Figures/Supplemental_Fig_S31.pdf]

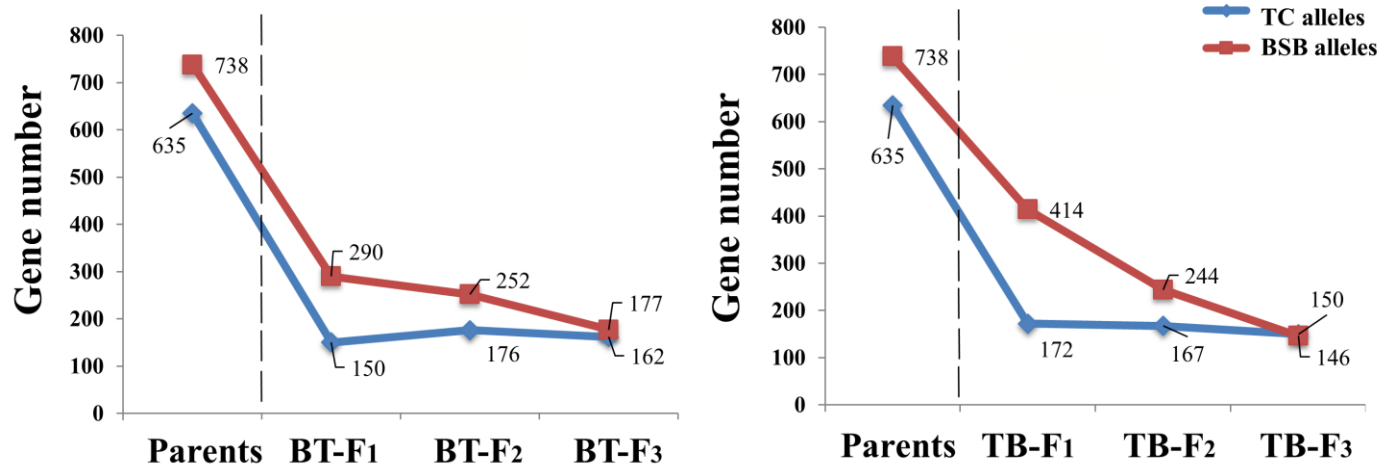

**Supplemental Fig. S31.** The number of genes with BSB and TC allelic expression bias ( $\log_2 |\text{TC}/\text{BSB}| > 1$  in parents and hybrids) in reciprocal cross hybrids.
