# Supplementary material for: The subgenomes show asymmetric expression of alleles in hybrid lineages of Megalobrama amblycephala × Culter alburnus
Source: HighWire-hosted journal article supplement (doi:10.1101/gr.249805.119), 2019-10-24
Supplement: Supplemental_Figures_zip.zip [file Supplemental_Fig_S32.pdf › Supplemental_Figures/Supplemental_Fig_S32.pdf]

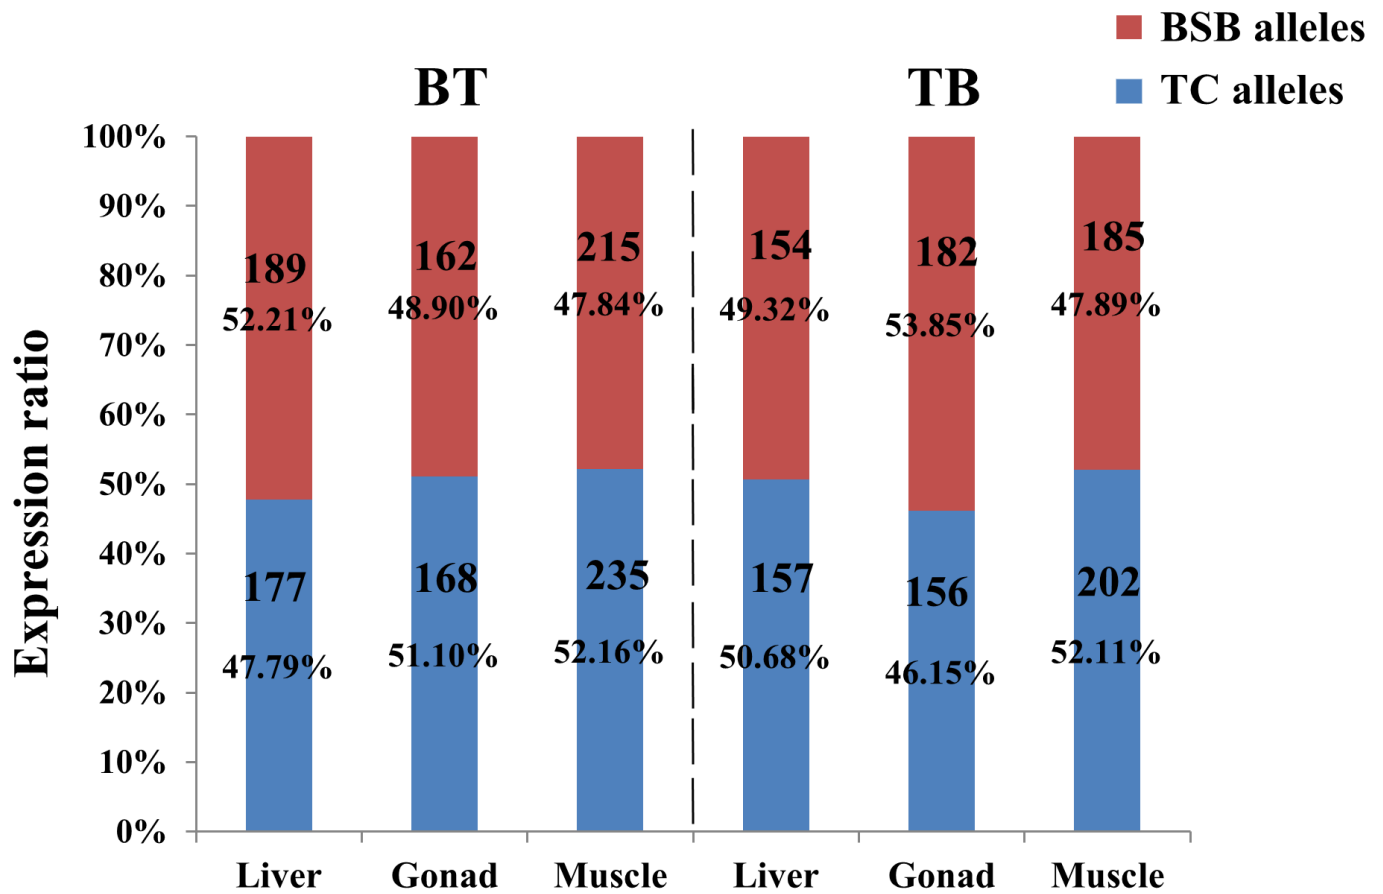

**Supplemental Fig. S32.** Ratio of BSB (red) and TC (blue) allelic expression based on RNA-seq in three tissues of BTF<sub>3</sub> and TBF<sub>3</sub>.
