# Supplementary material for: The subgenomes show asymmetric expression of alleles in hybrid lineages of Megalobrama amblycephala × Culter alburnus
Source: HighWire-hosted journal article supplement (doi:10.1101/gr.249805.119), 2019-10-24
Supplement: Supplemental_Figures_zip.zip [file Supplemental_Fig_S33.pdf › Supplemental_Figures/Supplemental_Fig_S33.pdf]

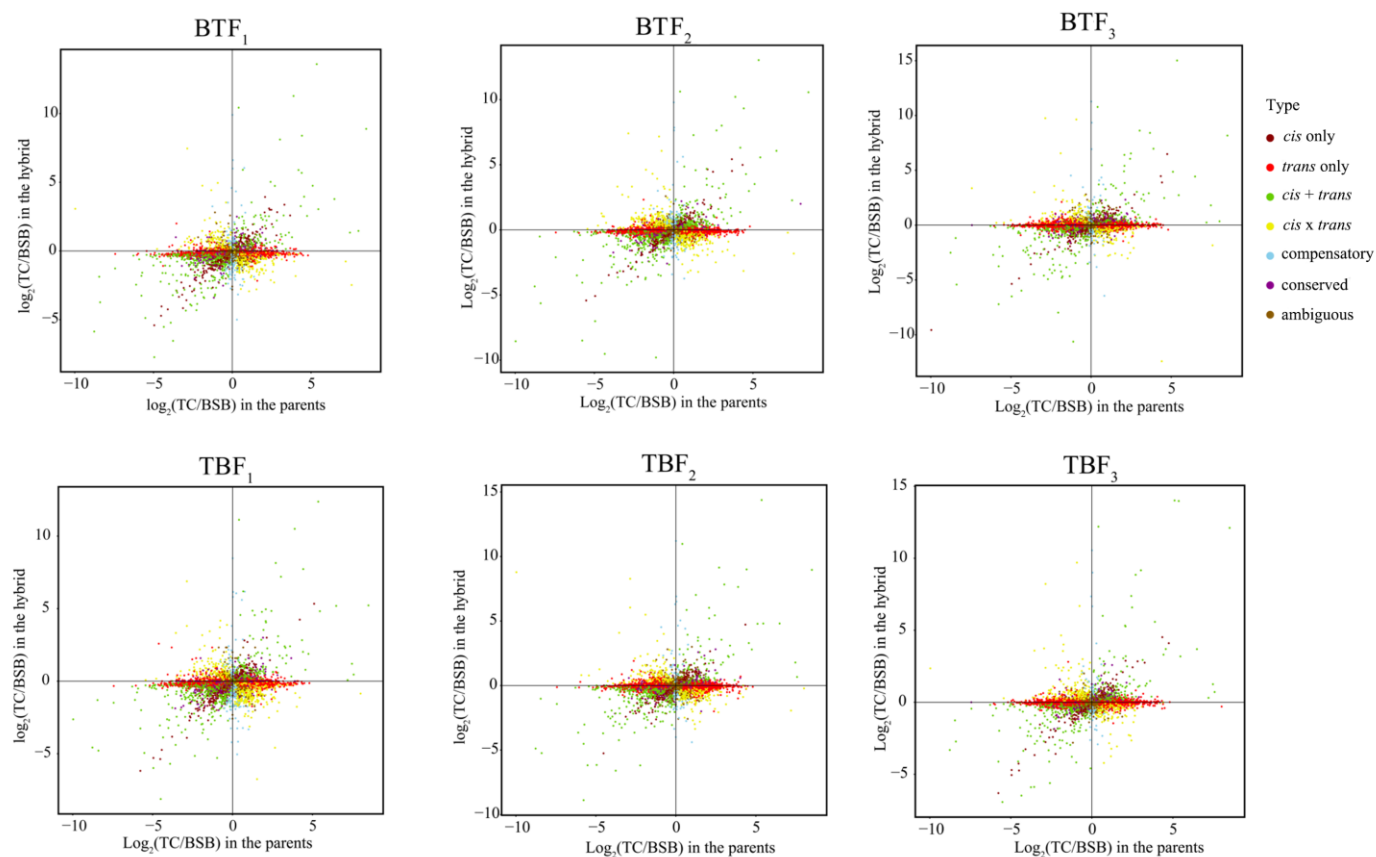

**Supplemental Fig. S33.** Diagrams of *cis*- and *trans*-regulation detected by allelic expression analysis in the liver. The plot summarizes the relative, allelic-specific expression levels in parents (APE) and F<sub>1</sub>-F<sub>3</sub> hybrids. Each point represents a single gene, and the points are color coded according to the mechanism of regulatory evolution inferred from statistical tests.
