# Supplementary material for: The subgenomes show asymmetric expression of alleles in hybrid lineages of Megalobrama amblycephala × Culter alburnus
Source: HighWire-hosted journal article supplement (doi:10.1101/gr.249805.119), 2019-10-24
Supplement: Supplemental_Figures_zip.zip [file Supplemental_Fig_S34.pdf › Supplemental_Figures/Supplemental_Fig_S34.pdf]

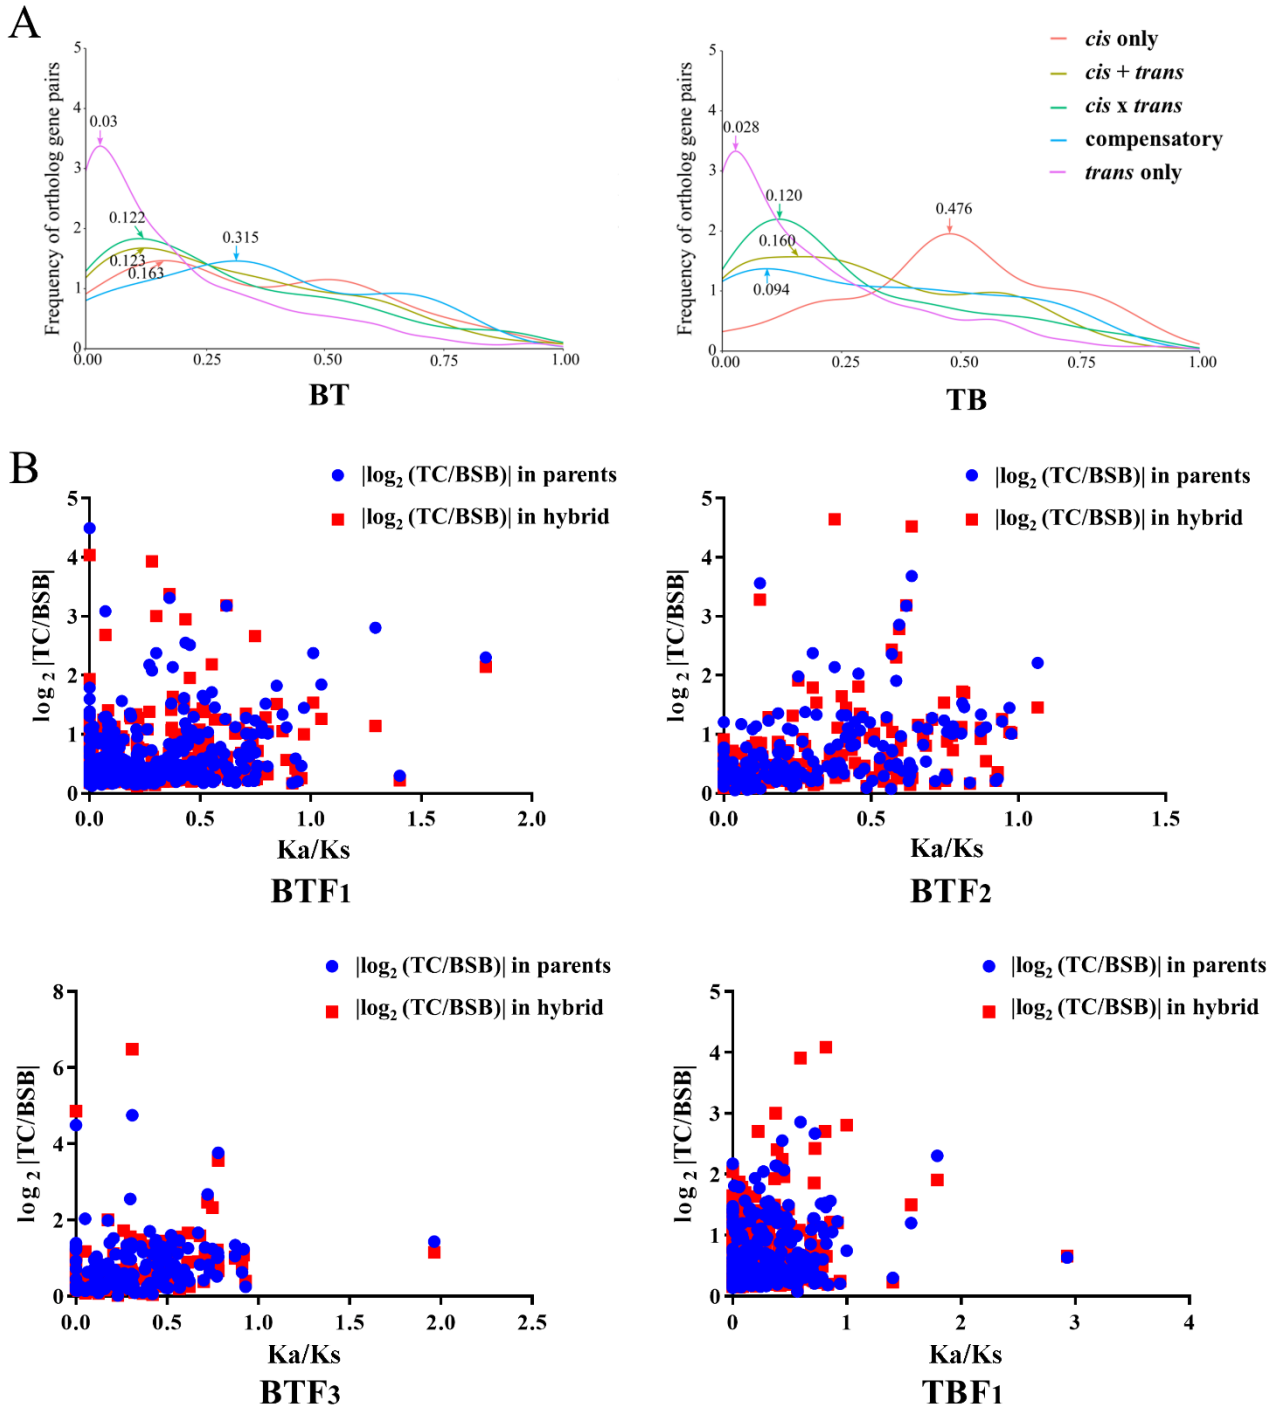

**Supplemental Fig. S34.** Correlation analysis between evolutionary constraint and expression polymorphism. (A) Distribution of  $Ka/Ks$  values in different categories of *cis*- and *trans*-regulated genes, which are shared in the liver tissue of reciprocal cross hybrids ( $F_1$ - $F_3$ ). (B) Correlation analysis of  $Ka/Ks$  values and the relevant  $\log_2 |\text{TC/BSB}|$  values of parents (red) and hybrids (blue) in the respective *cis*-regulated genes of different samples (BTf<sub>1</sub>-BTf<sub>3</sub>, TBF<sub>1</sub>). The correlation coefficients related to the  $\log_2 |\text{TC/BSB}|$  values of hybrids (blue) are 0.2706, 0.355, 0.1868 and 0.2564 in BTf<sub>1</sub>-BTf<sub>3</sub> and TBF<sub>1</sub> (all  $P$ -values < 0.05, Pearson correlation coefficient), respectively, while the correlation coefficients related to the  $\log_2 |\text{TC/BSB}|$  values of parents (red) are 0.3052, 0.3808, 0.1696 and 0.2158 in BTf<sub>1</sub>-BTf<sub>3</sub> and TBF<sub>1</sub> (all  $P$ -values < 0.05). Other hybrids (TBF<sub>2</sub>-TBF<sub>3</sub>) exhibited no significant correlations.
