# Supplementary material for: The subgenomes show asymmetric expression of alleles in hybrid lineages of Megalobrama amblycephala × Culter alburnus
Source: HighWire-hosted journal article supplement (doi:10.1101/gr.249805.119), 2019-10-24
Supplement: Supplemental_Figures_zip.zip [file Supplemental_Fig_S35.pdf › Supplemental_Figures/Supplemental_Fig_S35.pdf]

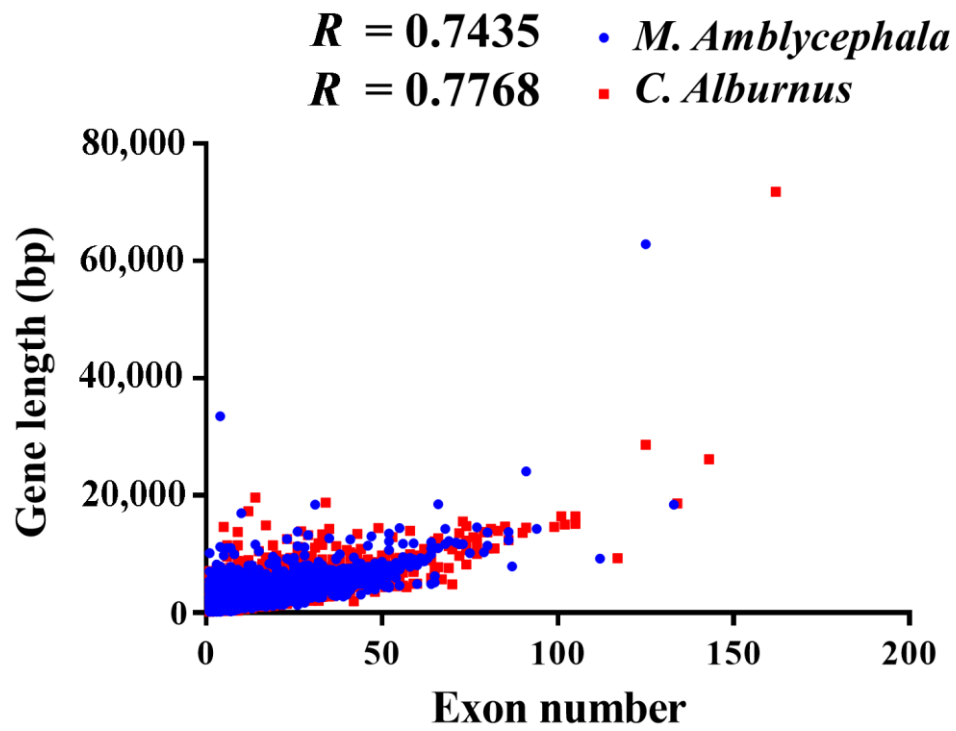

**Supplemental Fig. S35.** The correlation coefficients between exon number and the length of gene coding sequences (CDSs) detected in BSB and TC (all  $P$ -values  $< 0.0001$ , Pearson correlation coefficient).
