# Supplementary material for: The subgenomes show asymmetric expression of alleles in hybrid lineages of Megalobrama amblycephala × Culter alburnus
Source: HighWire-hosted journal article supplement (doi:10.1101/gr.249805.119), 2019-10-24
Supplement: Supplemental_Tables.zip [file Supplemental_Table_S1.pdf › Supplemental_Table/Supplemental_Table_S1.pdf]

**Supplemental Table S1. Summary of whole genome sequencing data of gynogenetic BSB.**

| Library                | Number of library | Data (bp)       | Depth (X) | Q20 (%) | Q30 (%) |
|------------------------|-------------------|-----------------|-----------|---------|---------|
| 220bp                  | 1                 | 51,960,504,158  | 46        | 97.64   | 92.27   |
| 500bp                  | 1                 | 19,120,390,700  | 17        | 94.08   | 86.72   |
| 3kb                    | 2                 | 18,015,161,940  | 16        | 93.43   | 87.52   |
|                        |                   | 14,589,994,770  | 13        | 95.46   | 91.34   |
| 4kb                    | 2                 | 12,363,897,960  | 11        | 97.54   | 91.52   |
|                        |                   | 15,399,743,660  | 14        | 93.94   | 88.39   |
| 8kb                    | 1                 | 18,863,382,886  | 17        | 95.80   | 91.53   |
| 10kb                   | 1                 | 13,594,540,130  | 12        | 93.36   | 87.53   |
| 15kb                   | 1                 | 9,624,838,380   | 9         | 97.08   | 90.10   |
| 17kb                   | 1                 | 7,416,162,504   | 7         | 93.49   | 87.63   |
| Total of Illumina data | 10                | 180,948,617,088 | 162       |         |         |
| PacBio                 | 1                 | 11,595,380,043  | 10        |         |         |
