# Supplementary material for: The subgenomes show asymmetric expression of alleles in hybrid lineages of Megalobrama amblycephala × Culter alburnus
Source: HighWire-hosted journal article supplement (doi:10.1101/gr.249805.119), 2019-10-24
Supplement: Supplemental_Tables.zip [file Supplemental_Table_S2.pdf › Supplemental_Table/Supplemental_Table_S2.pdf]

**Supplemental Table S2. Summary of whole-genome sequencing data of TC.**

| Library                | Number of library | Data (bp)       | Depth (X) | Q20 (%) | Q30 (%) |
|------------------------|-------------------|-----------------|-----------|---------|---------|
| 220 bp                 | 2                 | 44,268,253,415  | 50        | 91.98   | 86.52   |
|                        |                   | 24,675,636,640  | 28        | 93.37   | 88.36   |
| 500 bp                 | 1                 | 11,338,754,741  | 13        | 91.84   | 85.15   |
| 3 Kb                   | 2                 | 8,695,837,998   | 10        | 92.17   | 85.04   |
|                        |                   | 9,280,061,422   | 11        | 92.34   | 85.27   |
| 4 Kb                   | 2                 | 9,008,743,205   | 10        | 92.18   | 85.01   |
|                        |                   | 9,465,943,438   | 11        | 92.20   | 85.01   |
| 5                      | 2                 | 9,124,630,757   | 10        | 92.17   | 85.05   |
|                        |                   | 8,804,276,718   | 10        | 92.24   | 85.10   |
| 8 Kb                   | 1                 | 7,708,826,019   | 9         | 92.28   | 85.20   |
| 10 Kb                  | 1                 | 8,596,554,853   | 10        | 96.85   | 90.18   |
| 15 Kb                  | 1                 | 9,774,209,157   | 11        | 96.98   | 90.52   |
| 17 Kb                  | 1                 | 10,307,221,655  | 12        | 93.37   | 88.36   |
| Total of Illumina data | 13                | 171,048,950,018 | 194       |         |         |
| PacBio                 | 5                 | 884,686,180     | 6         |         |         |
|                        |                   | 1,030,557,313   |           |         |         |
|                        |                   | 1,022,571,945   |           |         |         |
|                        |                   | 1,345,732,363   |           |         |         |
|                        |                   | 992,851,585     |           |         |         |
| Total of PacBio data   | 5                 | 5,276,399,386   | 6         |         |         |
