# Supplementary material for: The subgenomes show asymmetric expression of alleles in hybrid lineages of Megalobrama amblycephala × Culter alburnus
Source: HighWire-hosted journal article supplement (doi:10.1101/gr.249805.119), 2019-10-24
Supplement: Supplemental_Tables.zip [file Supplemental_Table_S3.pdf › Supplemental_Table/Supplemental_Table_S3.pdf]

**Supplemental Table S3. Quality assessment of genome using metazoan and vertebrate database.**

| Database   | Species | Complete BUSCOs | Complete and<br>single-copy<br>BUSCOs | Complete and<br>duplicated BUSCOs | Fragmented BUSCOs | Missing BUSCOs | Total BUSCOs lineage |
|------------|---------|-----------------|---------------------------------------|-----------------------------------|-------------------|----------------|----------------------|
| Metazoan   | TC      | 4383 (95.62%)   | 4191 (91.43%)                         | 192 (4.19%)                       | 57 (1.24%)        | 144 (3.14%)    | 4584                 |
|            | BSB     | 4258 (92.89%)   | 4109 (89.64%)                         | 149 (3.25%)                       | 66 (1.44%)        | 260 (5.67%)    | 4584                 |
| Vertebrate | TC      | 2518 (97.37%)   | 2427 (93.85%)                         | 91 (3.52%)                        | 26 (1.01%)        | 42 (1.62%)     | 2586                 |
|            | BSB     | 2451 (94.78%)   | 2372 (91.72%)                         | 79 (3.05%)                        | 36 (1.39%)        | 99 (3.83%)     | 2586                 |
