# Supplementary material for: The subgenomes show asymmetric expression of alleles in hybrid lineages of Megalobrama amblycephala × Culter alburnus
Source: HighWire-hosted journal article supplement (doi:10.1101/gr.249805.119), 2019-10-24
Supplement: Supplemental_Tables.zip [file Supplemental_Table_S4.pdf › Supplemental_Table/Supplemental_Table_S4.pdf]

**Supplemental Table S4. Summary of HI-C data and anchored scaffolds in gynogenetic BSB.**

| Type                     | Number      | Ratio (%) |
|--------------------------|-------------|-----------|
| Unique paired alignments | 118,424,006 | 100.00    |
| Valid interaction pairs  | 88,531,588  | 74.76     |
| Dangling end pairs       | 14,797,644  | 12.50     |
| Re-ligation pairs        | 6,460,811   | 5.46      |
| Self-cycle pairs         | 630,822     | 0.53      |
| Dumped pairs             | 8,003,141   | 6.76      |
