# Supplementary material for: The subgenomes show asymmetric expression of alleles in hybrid lineages of Megalobrama amblycephala × Culter alburnus
Source: HighWire-hosted journal article supplement (doi:10.1101/gr.249805.119), 2019-10-24
Supplement: Supplemental_Tables.zip [file Supplemental_Table_S5.pdf › Supplemental_Table/Supplemental_Table_S5.pdf]

**Supplemental Table S5. HI-C data and anchored scaffolds in gynogenetic BSB.**

| Group                                    | Sequence number | Sequence length (bp)  |
|------------------------------------------|-----------------|-----------------------|
| Lachesis Group1                          | 202             | 57,266,060            |
| Lachesis Group2                          | 136             | 46,210,446            |
| Lachesis Group3                          | 335             | 65,993,661            |
| Lachesis Group4                          | 213             | 48,823,837            |
| Lachesis Group5                          | 113             | 52,136,339            |
| Lachesis Group6                          | 68              | 39,875,544            |
| Lachesis Group7                          | 154             | 57,774,668            |
| Lachesis Group8                          | 86              | 39,216,231            |
| Lachesis Group9                          | 114             | 45,603,368            |
| Lachesis Group10                         | 166             | 61,357,655            |
| Lachesis Group11                         | 64              | 32,940,538            |
| Lachesis Group12                         | 78              | 36,586,769            |
| Lachesis Group13                         | 61              | 38,390,451            |
| Lachesis Group14                         | 79              | 37,844,076            |
| Lachesis Group15                         | 125             | 42,817,526            |
| Lachesis Group16                         | 98              | 41,276,868            |
| Lachesis Group17                         | 77              | 39,512,734            |
| Lachesis Group18                         | 117             | 43,196,240            |
| Lachesis Group19                         | 140             | 41,279,196            |
| Lachesis Group20                         | 82              | 39,873,440            |
| Lachesis Group21                         | 103             | 38,408,423            |
| Lachesis Group22                         | 82              | 35,485,212            |
| Lachesis Group23                         | 75              | 34,068,668            |
| Lachesis Group24                         | 99              | 32,188,370            |
| Total clustered sequences (%)            | 2867 (15.90)    | 1,048,126,320 (96.37) |
| Total ordered and oriented sequences (%) | 1901 (66.31)    | 983,741,041 (93.86)   |
