# Supplementary material for: The subgenomes show asymmetric expression of alleles in hybrid lineages of Megalobrama amblycephala × Culter alburnus
Source: HighWire-hosted journal article supplement (doi:10.1101/gr.249805.119), 2019-10-24
Supplement: Supplemental_Tables.zip [file Supplemental_Table_S6.pdf › Supplemental_Table/Supplemental_Table_S6.pdf]

**Supplemental Table S6. High-density linkage map and anchored scaffolds in TC.**

| Linkage group | Physical size | Genetic distance (cM) | Average (cM) | NO. of bins | NO. of scaffolds anchored |
|---------------|---------------|-----------------------|--------------|-------------|---------------------------|
| LG01          | 40,807,515    | 134.28                | 0.84         | 159         | 19                        |
| LG02          | 42,375,726    | 136.44                | 0.81         | 169         | 12                        |
| LG03          | 38,965,678    | 120.94                | 0.80         | 151         | 18                        |
| LG04          | 30,003,032    | 155.78                | 1.30         | 120         | 19                        |
| LG05          | 40,843,294    | 151.97                | 1.28         | 119         | 14                        |
| LG06          | 33,268,905    | 138.54                | 0.98         | 142         | 9                         |
| LG07          | 31,723,947    | 128.88                | 1.01         | 127         | 9                         |
| LG08          | 25,747,547    | 94.04                 | 0.85         | 110         | 13                        |
| LG09          | 33,925,951    | 117.85                | 0.85         | 138         | 14                        |
| LG10          | 48,091,120    | 167.49                | 0.99         | 170         | 15                        |
| LG11          | 29,004,292    | 103.85                | 0.77         | 135         | 13                        |
| LG12          | 26,700,789    | 111.12                | 1.08         | 103         | 11                        |
| LG13          | 30,489,134    | 131.20                | 0.87         | 150         | 7                         |
| LG14          | 35,941,420    | 135.30                | 1.08         | 125         | 9                         |
| LG15          | 26,630,288    | 117.17                | 0.92         | 127         | 16                        |
| LG16          | 29,235,969    | 123.06                | 0.98         | 126         | 9                         |
| LG17          | 34,126,287    | 138.18                | 0.80         | 172         | 12                        |
| LG18          | 25,315,914    | 100.74                | 0.91         | 111         | 8                         |
| LG19          | 22,768,026    | 100.73                | 0.87         | 116         | 11                        |
| LG20          | 34,877,207    | 122.36                | 0.81         | 151         | 15                        |
| LG21          | 18,476,587    | 113.35                | 1.47         | 77          | 11                        |
| LG22          | 29,257,452    | 101.55                | 0.69         | 147         | 13                        |
| LG23          | 27,112,785    | 101.93                | 0.84         | 121         | 10                        |
| LG24          | 24,398,983    | 120.86                | 1.08         | 112         | 12                        |
| Total         | 760,087,848   | 2968.00               |              | 3178        | 299                       |
