# Supplementary material for: The subgenomes show asymmetric expression of alleles in hybrid lineages of Megalobrama amblycephala × Culter alburnus
Source: HighWire-hosted journal article supplement (doi:10.1101/gr.249805.119), 2019-10-24
Supplement: Supplemental_Tables.zip [file Supplemental_Table_S7.pdf › Supplemental_Table/Supplemental_Table_S7.pdf]

**Supplemental Table S7. The gene annotation of gynogenetic BSB and TC assemblies.**

| Annotation database | BSB               |                | TC                |                |
|---------------------|-------------------|----------------|-------------------|----------------|
|                     | NO. of annotation | Percentage (%) | NO. of annotation | Percentage (%) |
| GO                  | 15,023            | 40.05          | 14,411            | 46.69          |
| KEGG                | 9509              | 25.35          | 14,014            | 45.40          |
| KOG                 | 19,680            | 52.46          | 19,244            | 62.34          |
| TrEMBL              | 33,697            | 89.83          | 28,552            | 92.50          |
| NR                  | 33,728            | 89.91          | 28,801            | 93.31          |
| All annotated       | 37,147            | 99.03          | 28,930            | 93.72          |
