# Supplementary material for: The subgenomes show asymmetric expression of alleles in hybrid lineages of Megalobrama amblycephala × Culter alburnus
Source: HighWire-hosted journal article supplement (doi:10.1101/gr.249805.119), 2019-10-24
Supplement: Supplemental_Tables.zip [file Supplemental_Table_S8.pdf › Supplemental_Table/Supplemental_Table_S8.pdf]

**Supplemental Table S8. The summary of gynogenetic BSB and TC assemblies.**

| Type                       | BSB         | TC          |
|----------------------------|-------------|-------------|
| NO. of gene                | 29,994      | 30,443      |
| Gene length (bp)           | 329,088,741 | 475,227,227 |
| Average gene length (bp)   | 10,972      | 15,610      |
| Exon length (bp)           | 39,355,308  | 52,739,026  |
| Average exon length (bp)   | 172         | 199         |
| Intron length (bp)         | 282,757,623 | 392,443,673 |
| Average intron length (bp) | 1237        | 1478        |
