# Supplementary material for: The subgenomes show asymmetric expression of alleles in hybrid lineages of Megalobrama amblycephala × Culter alburnus
Source: HighWire-hosted journal article supplement (doi:10.1101/gr.249805.119), 2019-10-24
Supplement: Supplemental_Tables.zip [file Supplemental_Table_S9.pdf › Supplemental_Table/Supplemental_Table_S9.pdf]

**Supplemental Table S9. The non-coding RNA annotation of gynogenetic BSB and TC.**

|        | BSB  | TC   |
|--------|------|------|
| tRNA   | 891  | 470  |
| RNA    | 628  | 474  |
| snoRNA | 203  | 198  |
| snRNA  | 106  | 92   |
| miRNA  | 335  | 302  |
| Total  | 2163 | 1536 |
