# Supplementary material for: The subgenomes show asymmetric expression of alleles in hybrid lineages of Megalobrama amblycephala × Culter alburnus
Source: HighWire-hosted journal article supplement (doi:10.1101/gr.249805.119), 2019-10-24
Supplement: Supplemental_Tables.zip [file Supplemental_Table_S10.pdf › Supplemental_Table/Supplemental_Table_S10.pdf]

**Supplemental Table S10. Summary of gene clusters in the 10 species.**

| Name of species                 | Total gene | NO. of single copy gene | NO. of multi-copy gene | NO. of unigene gene | No. of cluster gene | Total clusters | Uni-clusters |
|---------------------------------|------------|-------------------------|------------------------|---------------------|---------------------|----------------|--------------|
| <i>Oryzias latipes</i>          | 19,652     | 3236                    | 4543                   | 508                 | 18,161              | 13,055         | 125          |
| <i>Ctenopharyngodon idellus</i> | 32,811     | 3035                    | 5462                   | 698                 | 24,978              | 17,587         | 259          |
| <i>Cyprinus carpio</i>          | 50,474     | 1238                    | 13,505                 | 494                 | 38,813              | 19,337         | 233          |
| <i>Larimichthys crocea</i>      | 19,555     | 3421                    | 3614                   | 550                 | 18,101              | 12,944         | 130          |
| <i>Xiphophorus maculatus</i>    | 20,364     | 3128                    | 5045                   | 86                  | 19,512              | 14,395         | 29           |
| <i>C. alburnus</i>              | 30,443     | 3043                    | 5455                   | 738                 | 26,003              | 17,783         | 217          |
| <i>Takifugu rubripes</i>        | 18,506     | 3165                    | 4932                   | 105                 | 17,840              | 12,726         | 38           |
| <i>Cynoglossus semilaevis</i>   | 20,766     | 3088                    | 5170                   | 81                  | 19,870              | 14,606         | 35           |
| <i>M. Amblycephala</i>          | 29,994     | 2944                    | 5960                   | 202                 | 26,566              | 19,036         | 84           |
| <i>Larimichthys crocea</i>      | 22,008     | 3031                    | 5396                   | 78                  | 20,948              | 15,189         | 32           |
