# Supplementary material for: The subgenomes show asymmetric expression of alleles in hybrid lineages of Megalobrama amblycephala × Culter alburnus
Source: HighWire-hosted journal article supplement (doi:10.1101/gr.249805.119), 2019-10-24
Supplement: Supplemental_Tables.zip [file Supplemental_Table_S11.pdf › Supplemental_Table/Supplemental_Table_S11.pdf]

**Supplemental Table S11. Summary of contracted gene clusters related to skeletal muscle and bone development between gynogenetic BSB and TC.**

|                          | Function in biological process category                           | GO ID      | NO. in BSB | NO. in TC |
|--------------------------|-------------------------------------------------------------------|------------|------------|-----------|
| Contracted gene clusters | skeletal muscle thin filament assembly                            | GO:0030240 | 0          | 12        |
|                          | slow-twitch skeletal muscle fiber contraction                     | GO:0031444 | 0          | 10        |
|                          | skeletal muscle tissue development                                | GO:0007519 | 0          | 1         |
|                          | skeletal myofibril assembly                                       | GO:0014866 | 0          | 1         |
|                          | insulin-like growth factor receptor signaling pathway             | GO:0048009 | 0          | 1         |
|                          | cartilage development involved in endochondral bone morphogenesis | GO:0060351 | 1          | 2         |
|                          | regulation of bone remodeling                                     | GO:0046850 | 0          | 1         |
|                          | regulation of bone resorption                                     | GO:0045124 | 0          | 1         |
|                          | bone development                                                  | GO:0060348 | 0          | 1         |
