# Supplementary material for: The subgenomes show asymmetric expression of alleles in hybrid lineages of Megalobrama amblycephala × Culter alburnus
Source: HighWire-hosted journal article supplement (doi:10.1101/gr.249805.119), 2019-10-24
Supplement: Supplemental_Tables.zip [file Supplemental_Table_S12.pdf › Supplemental_Table/Supplemental_Table_S12.pdf]

**Supplemental Table S12. Summary of the raw data of transcriptome.**

| Species              | Tissue | Number of libraries      | Total number of reads (million) | Total number of bases (Gb) | Average ratio of Q30 bases |
|----------------------|--------|--------------------------|---------------------------------|----------------------------|----------------------------|
| BSB (♀)              | Liver  | Illumina HiSeq™ 2000 ×1  | 82.42                           | 21.35                      | 92.91%                     |
|                      |        | Illumina Hiseq™ X Ten ×2 |                                 |                            |                            |
| TC (♂)               |        | Illumina HiSeq™ 2000 ×1  | 77.57                           | 19.93                      | 93.46%                     |
|                      |        | Illumina Hiseq™ X Ten ×2 |                                 |                            |                            |
| BTF <sub>1</sub> (♀) |        | Illumina HiSeq™ 2000 ×1  | 83.10                           | 21.51                      | 94.35%                     |
|                      |        | Illumina Hiseq™ X Ten ×2 |                                 |                            |                            |
| BTF <sub>2</sub> (♀) |        | Illumina HiSeq™ 2000 ×1  | 79.74                           | 20.52                      | 94.28%                     |
|                      |        | Illumina Hiseq™ X Ten ×2 |                                 |                            |                            |
| BTF <sub>3</sub> (♀) |        | Illumina HiSeq™ 4000 ×1  | 67.38                           | 20.02                      | 91.15%                     |
|                      |        | Illumina Hiseq™ X Ten ×2 |                                 |                            |                            |
| TBF <sub>1</sub> (♀) |        | Illumina HiSeq™ 4000 ×1  | 77.97                           | 23.16                      | 89.98%                     |
|                      |        | Illumina Hiseq™ X Ten ×2 |                                 |                            |                            |
| TBF <sub>2</sub> (♀) |        | Illumina HiSeq™ 4000 ×1  | 84.07                           | 24.91                      | 90.59%                     |
|                      |        | Illumina Hiseq™ X Ten ×2 |                                 |                            |                            |
| TBF <sub>3</sub> (♀) |        | Illumina Hiseq™ X Ten ×3 | 72.08                           | 21.27                      | 94.15%                     |
| BTF <sub>3</sub> (♀) | Gonad  | Illumina Hiseq™ X Ten ×3 | 73.31                           | 21.65                      | 94.15%                     |
| TBF <sub>3</sub> (♀) |        | Illumina Hiseq™ X Ten ×3 | 81.60                           | 24.37                      | 91.04%                     |
| BTF <sub>3</sub> (♀) | Muscle | Illumina Hiseq™ X Ten ×3 | 105.17                          | 31.29                      | 92.03%                     |
| TBF <sub>3</sub> (♀) |        | Illumina Hiseq™ X Ten ×3 | 69.96                           | 20.79                      | 91.46%                     |
