# Supplementary material for: The subgenomes show asymmetric expression of alleles in hybrid lineages of Megalobrama amblycephala × Culter alburnus
Source: HighWire-hosted journal article supplement (doi:10.1101/gr.249805.119), 2019-10-24
Supplement: Supplemental_Tables.zip [file Supplemental_Table_S14.pdf › Supplemental_Table/Supplemental_Table_S14.pdf]

**Supplemental Table S14. Primers used in PCR.**

| Gene symbol    | Forward primer (5'-3')     | Reverse primer (5'-3')       |
|----------------|----------------------------|------------------------------|
| <i>ACBD5</i>   | GTATCTAACGGCAATGTCGGTCAAC  | CTCGGCTGCCCCGTCCATCT         |
| <i>IGFALS</i>  | TACACACTGGGGACATCAGTGGT    | CAAGACAGGTGTTGCAGTGGC        |
| <i>GPDI</i>    | GACGGTGGTGGAGGAGGCTGAT     | GGCAGGTGACGAACTCTTTGAC       |
| <i>GPI</i>     | GCTCGGCGTCTGGTACGTCAACT    | GGCAGGAGTTTCTCCAGTGCATC      |
| <i>SLC43A</i>  | GGTCTGGTCTGCCTCAACTGTTT    | CAGCACATTTGTGAAGATGAAGG      |
| <i>ASXL1</i>   | CAATGTTGAATCCTCCTCAGCAC    | AGCAGTCCTTCCATAGCTCCAC       |
| <i>F10</i>     | GCTCACTGTATGAATCAGTCGCTC   | TTCTGGATCCACTGGATGTACTTG     |
| <i>NR1D2</i>   | GAATAACATGATGAACAACAGTCAGC | CACGAAGGGGGAAACGCTCAT        |
| <i>AMT</i>     | GTCTCGCTGACTGAAAAGCTGTTAG  | CCTATAACCCTGCCATCAGATGAC     |
| <i>NOCT</i>    | CTGGTCTGAGAGGAAGTATCTCATAC | CTCGGTATCCTCAGCACAGCGT       |
| <i>ELF2</i>    | GCAGGTTCTGTTCTCATGACGAC    | GCAGCACTGTAACTGTCTGATCC      |
| <i>DPP4</i>    | GAGGTGAGAGTTCTTGAAGACAACAG | AGACACCGGAGCGACAGCCATAC      |
| <i>SLC8A1</i>  | GTCTCGAATCTAACTCTCATGGCTC  | CCTCCACCTTTTGCTGTGCCTTC      |
| <i>FOXA3</i>   | GAACTCAGTGAGCAGCTTGAACAG   | GCATTGAGGACAGACCTGCTGT       |
| <i>EPHX2</i>   | GATGATTTCTGAGTTTGAAGCCGAG  | CCTCTATTCTGTAAAGTTTCTGGATTTC |
| <i>CCR4</i>    | CTCAGTCTCAACAGCAAGCACAGGT  | CCAGTTCCTCCTCCAGGTGTTGT      |
| <i>CYP51</i>   | CTGTCTGAAGGAGACGCTCCGAC    | GTGTGTATCTGATGACGGGGTTG      |
| <i>HNRNPA1</i> | CATATTCCAGCGTGACTGAAGTCG   | GGACCATAGTTGGACTGCTGGTT      |
| <i>KCNQ1</i>   | GGGCTCATCTTCTCTTCTACTTTG   | TTGAATCTTGTCTGCCGTCCCTT      |
