# Supplementary material for: The subgenomes show asymmetric expression of alleles in hybrid lineages of Megalobrama amblycephala × Culter alburnus
Source: HighWire-hosted journal article supplement (doi:10.1101/gr.249805.119), 2019-10-24
Supplement: Supplemental_Tables.zip [file Supplemental_Table_S15.pdf › Supplemental_Table/Supplemental_Table_S15.pdf]

**Supplemental Table S15. Summary of full-length transcriptome.**

| Type                                | TBF <sub>3</sub> | BTF <sub>3</sub> |
|-------------------------------------|------------------|------------------|
| The sequencing datas (Gb)           | 21.22            | 15.49            |
| Insert reads (Gb)                   | 2.02             | 1.30             |
| Average length of insert reads (bp) | 3080.18          | 2936.23          |
| Average full pass of insert reads   | 12               | 13               |
| Number of consensus reads           | 663,834          | 479,667          |
| Number of five prime reads          | 622,119 (93.72%) | 459,029 (95.70%) |
| Number of three prime reads         | 628,065 (94.61%) | 456,107 (95.09%) |
| Number of full-length reads         | 586,075 (88.29%) | 431,999 (90.06%) |
