# Supplementary material for: The subgenomes show asymmetric expression of alleles in hybrid lineages of Megalobrama amblycephala × Culter alburnus
Source: HighWire-hosted journal article supplement (doi:10.1101/gr.249805.119), 2019-10-24
Supplement: Supplemental_Tables.zip [file Supplemental_Table_S16.pdf › Supplemental_Table/Supplemental_Table_S16.pdf]

**Supplemental Table S16. Summary of transcriptome data mapped to gynogenetic BSB and TC genomes.**

|                         |                                  | Total              |                       | Vs. to TC             |                | Vs. to BSB            |                |
|-------------------------|----------------------------------|--------------------|-----------------------|-----------------------|----------------|-----------------------|----------------|
| Sample                  |                                  | Clean data<br>(GB) | No. of clean<br>reads | No. of clean<br>reads | Percent<br>(%) | No. of clean<br>reads | Percent<br>(%) |
| BSB liver               | BSB-L <sub>1</sub>               | 4.97               | 27,643,051            |                       |                | 22,865,467            | 89.41          |
|                         | BSB-L <sub>2</sub>               | 8.08               | 27,038,378            |                       |                | 22,580,704            | 83.51          |
|                         | BSB-L <sub>3</sub>               | 8.29               | 27,741,014            |                       |                | 22,653,511            | 81.66          |
| TC liver                | TC-L <sub>1</sub>                | 4.94               | 27,448,369            | 24,480,213            | 95.73          |                       |                |
|                         | TC-L <sub>2</sub>                | 7.67               | 25,659,315            | 20,654,797            | 80.50          |                       |                |
|                         | TC-L <sub>3</sub>                | 7.32               | 24,458,138            | 19,201,103            | 78.51          |                       |                |
| BTF <sub>1</sub> liver  | BTF <sub>1</sub> -L <sub>1</sub> | 4.98               | 27,665,485            | 23,306,511            | 84.24          | 23,783,946            | 85.97          |
|                         | BTF <sub>1</sub> -L <sub>2</sub> | 8.88               | 29,803,886            | 22,161,879            | 74.36          | 22,450,177            | 75.33          |
|                         | BTF <sub>1</sub> -L <sub>3</sub> | 7.81               | 26,112,886            | 19,126,525            | 73.25          | 18,478,654            | 70.76          |
| BTF <sub>2</sub> liver  | BTF <sub>2</sub> -L <sub>1</sub> | 4.98               | 27,644,954            | 23,667,883            | 85.61          | 23,351,976            | 84.47          |
|                         | BTF <sub>2</sub> -L <sub>2</sub> | 7.56               | 25,303,205            | 19,774,470            | 78.15          | 20,431,622            | 80.75          |
|                         | BTF <sub>2</sub> -L <sub>3</sub> | 8.16               | 27,302,773            | 20,799,688            | 76.18          | 20,553,404            | 75.28          |
| BTF <sub>3</sub> liver  | BTF <sub>3</sub> -L <sub>1</sub> | 6.38               | 21,505,106            | 16,104,313            | 74.89          | 16,536,210            | 76.89          |
|                         | BTF <sub>3</sub> -L <sub>2</sub> | 7.95               | 26,765,426            | 19,735,643            | 73.74          | 20,386,200            | 76.17          |
|                         | BTF <sub>3</sub> -L <sub>3</sub> | 8.24               | 27,707,745            | 20,391,228            | 73.59          | 21,055,907            | 75.99          |
| BTF <sub>3</sub> gonad  | BTF <sub>3</sub> -G <sub>1</sub> | 6.97               | 23,492,474            | 17,715,870            | 75.41          | 18,363,510            | 78.17          |
|                         | BTF <sub>3</sub> -G <sub>2</sub> | 6.98               | 23,463,381            | 19,056,188            | 81.22          | 19,600,957            | 83.54          |
|                         | BTF <sub>3</sub> -G <sub>3</sub> | 6.83               | 22,967,018            | 18,271,252            | 79.55          | 18,802,484            | 81.87          |
| BTF <sub>3</sub> muscle | BTF <sub>3</sub> -M <sub>1</sub> | 7.72               | 25,932,371            | 20,726,391            | 79.92          | 21,088,864            | 81.32          |
|                         | BTF <sub>3</sub> -M <sub>2</sub> | 7.83               | 26,344,255            | 22,137,445            | 84.03          | 22,382,977            | 84.96          |
|                         | BTF <sub>3</sub> -M <sub>3</sub> | 7.15               | 24,036,571            | 20,105,232            | 83.64          | 20,392,923            | 84.84          |
| TBF <sub>1</sub> liver  | TBF <sub>1</sub> -L <sub>1</sub> | 9.67               | 32,202,828            | 25,366,776            | 78.77          | 24,917,364            | 77.38          |
|                         | TBF <sub>1</sub> -L <sub>2</sub> | 6.45               | 21,603,885            | 14,796,377            | 68.49          | 14,672,325            | 67.92          |
|                         | TBF <sub>1</sub> -L <sub>3</sub> | 6.19               | 20,745,152            | 15,619,781            | 75.29          | 15,369,124            | 74.09          |
| TBF <sub>2</sub> liver  | TBF <sub>2</sub> -L <sub>1</sub> | 9.29               | 30,981,040            | 23,496,515            | 75.84          | 24,688,106            | 79.69          |
|                         | TBF <sub>2</sub> -L <sub>2</sub> | 6.74               | 22,559,274            | 17,131,139            | 75.94          | 16,799,177            | 74.47          |
|                         | TBF <sub>2</sub> -L <sub>3</sub> | 6.59               | 22,055,454            | 17,240,080            | 78.17          | 16,875,375            | 76.51          |
| TBF <sub>3</sub> liver  | TBF <sub>3</sub> -L <sub>1</sub> | 9.93               | 33,685,355            | 26,282,831            | 78.02          | 25,778,207            | 76.53          |
|                         | TBF <sub>3</sub> -L <sub>2</sub> | 14.31              | 47,902,702            | 38,937,977            | 81.29          | 37,553,679            | 78.40          |
|                         | TBF <sub>3</sub> -L <sub>3</sub> | 10.18              | 34,104,672            | 27,278,896            | 79.99          | 26,540,111            | 77.82          |
| TBF <sub>3</sub> gonad  | TBF <sub>3</sub> -G <sub>1</sub> | 6.81               | 23,166,757            | 17,325,352            | 74.79          | 17,084,426            | 73.75          |
|                         | TBF <sub>3</sub> -G <sub>2</sub> | 8.28               | 27,702,657            | 22,557,514            | 81.43          | 22,669,581            | 81.83          |
|                         | TBF <sub>3</sub> -G <sub>3</sub> | 8.37               | 27,960,466            | 21,133,320            | 75.58          | 20,783,244            | 74.33          |
| TBF <sub>3</sub> muscle | TBF <sub>3</sub> -M <sub>1</sub> | 6.21               | 20,954,132            | 16,536,725            | 78.92          | 16,670,739            | 79.56          |
|                         | TBF <sub>3</sub> -M <sub>2</sub> | 7.15               | 24,082,485            | 19,929,518            | 82.76          | 20,116,739            | 83.53          |
|                         | TBF <sub>3</sub> -M <sub>3</sub> | 7.25               | 24,368,409            | 19,620,592            | 80.52          | 19,738,581            | 81.00          |
| Total                   |                                  | 273.12             | 960,111,069           | 690,670,024           |                | 696,016,271           |                |
