# Supplementary material for: The subgenomes show asymmetric expression of alleles in hybrid lineages of Megalobrama amblycephala × Culter alburnus
Source: HighWire-hosted journal article supplement (doi:10.1101/gr.249805.119), 2019-10-24
Supplement: Supplemental_Tables.zip [file Supplemental_Table_S17.pdf › Supplemental_Table/Supplemental_Table_S17.pdf]

**Supplemental Table S17. The number of silent genes based on expression of the hybrids and their inbred parents (at the threshold of 10 allelic reads per million reads)**

| Sample                           | NO. of silent genes<br>(BSB $\geq 5$ , TC $\geq 5$ , F <sub>n</sub> = 0) |
|----------------------------------|--------------------------------------------------------------------------|
| BTF <sub>1</sub> -L <sub>1</sub> | 1                                                                        |
| BTF <sub>1</sub> -L <sub>2</sub> | 8                                                                        |
| BTF <sub>1</sub> -L <sub>3</sub> | 12                                                                       |
| BTF <sub>2</sub> -L <sub>1</sub> | 4                                                                        |
| BTF <sub>2</sub> -L <sub>2</sub> | 6                                                                        |
| BTF <sub>2</sub> -L <sub>3</sub> | 5                                                                        |
| BTF <sub>3</sub> -L <sub>1</sub> | 4                                                                        |
| BTF <sub>3</sub> -L <sub>2</sub> | 8                                                                        |
| BTF <sub>3</sub> -L <sub>3</sub> | 4                                                                        |
| Shared among BT-L                | 0                                                                        |
| TBF <sub>1</sub> -L <sub>1</sub> | 4                                                                        |
| TBF <sub>1</sub> -L <sub>2</sub> | 6                                                                        |
| TBF <sub>1</sub> -L <sub>3</sub> | 154                                                                      |
| TBF <sub>2</sub> -L <sub>1</sub> | 9                                                                        |
| TBF <sub>2</sub> -L <sub>2</sub> | 5                                                                        |
| TBF <sub>2</sub> -L <sub>3</sub> | 13                                                                       |
| TBF <sub>3</sub> -L <sub>1</sub> | 3                                                                        |
| TBF <sub>3</sub> -L <sub>2</sub> | 3                                                                        |
| TBF <sub>3</sub> -L <sub>3</sub> | 3                                                                        |
| Shared among BTF <sub>3</sub>    | 0                                                                        |
