# Supplementary material for: The subgenomes show asymmetric expression of alleles in hybrid lineages of Megalobrama amblycephala × Culter alburnus
Source: HighWire-hosted journal article supplement (doi:10.1101/gr.249805.119), 2019-10-24
Supplement: Supplemental_Tables.zip [file Supplemental_Table_S18.pdf › Supplemental_Table/Supplemental_Table_S18.pdf]

**Supplemental Table S18. Allelic expression bias based on log<sub>2</sub> (TC/BSB) in their reciprocal cross hybrids.**

|    |                                       | Potential BSB bias in progeny <sup>a</sup> | Potential TC bias in progeny <sup>a</sup> | Total |
|----|---------------------------------------|--------------------------------------------|-------------------------------------------|-------|
| BT | F <sub>1</sub> (%) <sup>a</sup>       | 8811 (92.64%)                              | 700 (7.36%)                               | 9511  |
|    | Liver F <sub>2</sub> (%) <sup>a</sup> | 7990 (85.83%)                              | 1319 (14.17%)                             | 9309  |
|    | Gonad F <sub>3</sub> (%) <sup>a</sup> | 2233 (23.92%)                              | 7102 (76.08%)                             | 9335  |
|    | Muscle                                | 3088 (34.54%)                              | 5853 (65.46%)                             | 8941  |
|    |                                       |                                            |                                           |       |
| TB | F <sub>1</sub> (%) <sup>a</sup>       | 8290 (89.95%)                              | 926 (10.05%)                              | 9216  |
|    | Liver F <sub>2</sub> (%) <sup>a</sup> | 6725 (75.01%)                              | 2241 (24.99%)                             | 8966  |
|    | Gonad F <sub>3</sub> (%) <sup>a</sup> | 6352 (68.38%)                              | 2937 (31.62%)                             | 9289  |
|    | Muscle                                | 2843 (31.55%)                              | 6167 (68.45%)                             | 9010  |

<sup>a</sup> The ratios of TC/BSB allelic expression with smaller than 0 were considered as potential BSB bias in hybrids. Conversely, it represented as potential TC bias
