# Supplementary material for: The subgenomes show asymmetric expression of alleles in hybrid lineages of Megalobrama amblycephala × Culter alburnus
Source: HighWire-hosted journal article supplement (doi:10.1101/gr.249805.119), 2019-10-24
Supplement: Supplemental_Tables.zip [file Supplemental_Table_S19.pdf › Supplemental_Table/Supplemental_Table_S19.pdf]

**Supplemental Table S19. Summary of *cis*- and *trans*-regulatory differences in their reciprocal cross hybrids**

|                             |                          | BT                                    |                          |                                 |                                 |                                 |                    | TB                              |                                 |                                 |                    |                           |
|-----------------------------|--------------------------|---------------------------------------|--------------------------|---------------------------------|---------------------------------|---------------------------------|--------------------|---------------------------------|---------------------------------|---------------------------------|--------------------|---------------------------|
|                             |                          | Expression in<br>parents <sup>a</sup> | Expression in<br>progeny | F <sub>1</sub> (%) <sup>b</sup> | F <sub>2</sub> (%) <sup>b</sup> | F <sub>3</sub> (%) <sup>b</sup> | Shared<br>among BT | F <sub>1</sub> (%) <sup>b</sup> | F <sub>2</sub> (%) <sup>b</sup> | F <sub>3</sub> (%) <sup>b</sup> | Shared<br>among TB | Shared among<br>BT and TB |
| Conserved                   |                          | B=T                                   | B=T                      | 1055<br>(10.82%)                | 912<br>(9.35%)                  | 966<br>(9.90%)                  | 359 (3.68%)        | 1194<br>(12.24%)                | 1045<br>(10.71%)                | 803<br>(8.23%)                  | 378 (3.88%)        | 205 (2.10%)               |
|                             |                          | B>T <sup>c</sup>                      | B>T <sup>c</sup>         | 1373<br>(14.08%)                | 803<br>(8.23%)                  | 396<br>(4.06%)                  | 209 (2.14%)        | 1119<br>(11.47%)                | 718<br>(7.36%)                  | 480<br>(4.92%)                  | 257 (2.64%)        | 108 (1.11%)               |
|                             |                          | B<T <sup>c</sup>                      | B<T <sup>c</sup>         | 131<br>(1.34%)                  | 199<br>(2.04%)                  | 247<br>(2.53%)                  | 56 (0.57%)         | 149<br>(1.53%)                  | 174<br>(1.78%)                  | 198<br>(2.03%)                  | 61 (0.63%)         | 35 (0.36%)                |
| <i>Cis</i> + <i>trans</i>   | Parental<br>condition    | B>T <sup>c</sup>                      | B>T <sup>c</sup>         | 450<br>(4.61%)                  | 182<br>(1.87%)                  | 108<br>(1.11%)                  | 16 (0.16%)         | 344<br>(3.53%)                  | 171<br>(1.75%)                  | 112<br>(1.15%)                  | 20 (0.21%)         | 2 (0.02%)                 |
|                             |                          | B<T <sup>d</sup>                      | B<T <sup>d</sup>         | 59 (0.60%)                      | 60 (0.62%)                      | 75 (0.77%)                      | 4 (0.04%)          | 58 (0.59%)                      | 72 (0.74%)                      | 69 (0.71%)                      | 7 (0.07%)          | 2 (0.02%)                 |
| Total in parental condition |                          |                                       |                          | 3068<br>(31.46%)                | 2156<br>(22.11%)                | 1792<br>(18.37%)                | 644 (6.60%)        | 2864<br>(29.37%)                | 2180<br>(22.35%)                | 1662<br>(17.04%)                | 723 (7.41%)        | 352 (3.61%)               |
| <i>Trans</i> only           | No bias in<br>progeny    | B>T                                   | B=T                      | 1005<br>(10.30%)                | 1789<br>(18.34%)                | 2333<br>(23.92%)                | 767 (7.86%)        | 1209<br>(12.40%)                | 1924<br>(19.73%)                | 2343<br>(24.02%)                | 904 (9.27%)        | 508 (5.21%)               |
|                             |                          | B<T                                   | B=T                      | 1643<br>(16.85%)                | 2285<br>(23.43%)                | 2341<br>(24.00%)                | 1176<br>(12.06%)   | 1815<br>(18.61%)                | 2230<br>(22.86%)                | 2484<br>(25.47%)                | 1340<br>(13.74%)   | 845 (8.66%)               |
| Compensatory                | Novel bias in<br>progeny | B=T                                   | B>T                      | 273<br>(2.80%)                  | 131<br>(1.34%)                  | 69 (0.71%)                      | 29 (0.30%)         | 247<br>(2.53%)                  | 115<br>(1.18%)                  | 67 (0.69%)                      | 22 (0.23%)         | 13 (0.13%)                |
|                             |                          | B=T                                   | B<T                      | 50 (0.51%)                      | 89 (0.91%)                      | 61 (0.63%)                      | 16 (0.16%)         | 49 (0.50%)                      | 52 (0.53%)                      | 54 (0.55%)                      | 13 (0.13%)         | 9 (0.09%)                 |
| <i>Cis</i> x <i>trans</i>   | Novel bias in<br>progeny | B>T                                   | B<T                      | 130<br>(1.33%)                  | 256<br>(2.62%)                  | 293<br>(3.00%)                  | 43 (0.44%)         | 171<br>(1.75%)                  | 231<br>(2.37%)                  | 247<br>(2.53%)                  | 57 (0.58%)         | 32 (0.33%)                |
|                             |                          | B<T                                   | B>T                      | 1358<br>(13.92%)                | 594<br>(6.09%)                  | 297<br>(3.05%)                  | 151 (1.55%)        | 1069<br>(10.96%)                | 488<br>(5.00%)                  | 318<br>(3.26%)                  | 147 (1.51%)        | 68 (0.70%)                |
| Total in novel in progeny   |                          |                                       |                          | 1811<br>(18.57%)                | 1070<br>(10.97%)                | 720<br>(7.38%)                  | 2046<br>(20.98%)   | 1536<br>(15.75%)                | 886<br>(9.08%)                  | 686<br>(7.03%)                  | 2159<br>(22.14%)   | 1840 (18.87%)             |
| Ambiguous                   |                          |                                       |                          | 2226<br>(22.82%)                | 2453<br>(25.15%)                | 2567<br>(26.32%)                | 2285<br>(23.43%)   | 2329<br>(23.88%)                | 2533<br>(25.97%)                | 2,578<br>(26.43%)               | 2398<br>(24.59%)   | 1962 (20.12%)             |

Abbreviation: SNP, single nucleotide polymorphism. B = T denotes equal expression; B > T and B < T denote B-biased and T-biased expression, respectively.

<sup>a</sup> Based on comparison of parental B and parental T.

<sup>b</sup> Based on comparison of gene expression values of B and T which were divided by genome-diagnostic SNPs.

<sup>c</sup> The significant differential expression between the  $\log_2$  (B/T) in parents and hybrids.

<sup>d</sup> The no significant differential expression between the  $\log_2$  (B/T) in parents and hybrids.
