# Supplementary material for: The subgenomes show asymmetric expression of alleles in hybrid lineages of Megalobrama amblycephala × Culter alburnus
Source: HighWire-hosted journal article supplement (doi:10.1101/gr.249805.119), 2019-10-24
Supplement: Supplemental_Tables.zip [file Supplemental_Table_S20.pdf › Supplemental_Table/Supplemental_Table_S20.pdf]

**Supplemental Table S20. Statistical analysis of correlation coefficients between *Ka/Ks* values in parents and  $|\log_2(\text{TC/BSB})|$  values both in parents and hybrids.**

| <i>Ka/Ks</i> in samples | $ \log_2(\text{TC/BSB}) $ in hybrids |                 | $ \log_2(\text{TC/BSB}) $ in parents |                 | Gene number |
|-------------------------|--------------------------------------|-----------------|--------------------------------------|-----------------|-------------|
|                         | <i>R</i>                             | <i>P</i> -value | <i>R</i>                             | <i>P</i> -value |             |
| BTF <sub>1</sub>        | 0.2706                               | <0.0001         | 0.3052                               | <0.0001         | 400         |
| BTF <sub>2</sub>        | 0.3550                               | <0.0001         | 0.3808                               | <0.0001         | 182         |
| BTF <sub>3</sub>        | 0.1868                               | 0.0422          | 0.1696                               | 0.0422          | 144         |
| TBF <sub>1</sub>        | 0.2564                               | <0.0001         | 0.2158                               | 0.0001          | 314         |
| TBF <sub>2</sub>        | 0.1127                               | 0.1308          | 0.2164                               | 0.0034          | 181         |
| TBF <sub>3</sub>        | 0.1332                               | 0.1220          | 0.1298                               | 0.1319          | 136         |
