# Supplementary material for: The subgenomes show asymmetric expression of alleles in hybrid lineages of Megalobrama amblycephala × Culter alburnus
Source: HighWire-hosted journal article supplement (doi:10.1101/gr.249805.119), 2019-10-24
Supplement: Supplemental_Tables.zip [file Supplemental_Table_S21.pdf › Supplemental_Table/Supplemental_Table_S21.pdf]

**Supplemental Table S21. Measurable traits of lateral line scales and fins rays in the origin parents and their reciprocal cross hybrids.**

| Fish type        | Lateral line scales  | Upper lateral line scales | Lower lateral line scales | Dorsal fins rays           | Abdominal fins rays | Anal fins rays               |
|------------------|----------------------|---------------------------|---------------------------|----------------------------|---------------------|------------------------------|
| BSB              | 50.9±0.99<br>(49~52) | 9.40±0.52<br>(9~10)       | 9.9±0.86<br>(9~11)        | III+8.4±0.51<br>(III+8~9)  | 8.9±0.86<br>(8~10)  | III+25.7±0.67<br>(III+25~27) |
| TC               | 86.6±3.09<br>(80~92) | 17.10±1.20<br>(16~19)     | 6.5±0.53<br>(6~7)         | III+7.00±0.00<br>(III+7)   | 9.00±0.00<br>(9)    | III+21.9±0.99<br>(III+20~23) |
| BTF <sub>1</sub> | 62.1±2.23<br>(59~64) | 12.4±0.70<br>(11~13)      | 10.1±0.57<br>(9~11)       | III +8.0±0.00<br>(III+8)   | 9.1±0.32<br>(9~10)  | III+23.3±0.67<br>(III+22~24) |
| BTF <sub>2</sub> | 60.8±2.57<br>(57~64) | 12.7±0.67<br>(12~14)      | 10.1±0.57<br>(9~11)       | III +8.1±0.31<br>(III+8~9) | 9.2±0.42<br>(9~10)  | III+22.5±1.43<br>(III+20~25) |
| BTF <sub>3</sub> | 64.3±1.15<br>(63~65) | 11.7±0.58<br>(11~12)      | 10.3±0.58<br>(9~11)       | III +9.00±0.00<br>(III+9)  | 9.00±0.00<br>(9)    | III+25.7±1.15<br>(III+25~27) |
| TBF <sub>1</sub> | 64.5±2.59<br>(60~69) | 13.1±0.74<br>(12~14)      | 10.1±0.57<br>(9~11)       | III +8.0±0.00<br>(III+8)   | 9.1±0.32<br>(9~10)  | III+23.0±0.94<br>(III+21~24) |
| TBF <sub>2</sub> | 60.7±3.4<br>(55~64)  | 13.0±1.05<br>(11~15)      | 9.7±0.67<br>(9~10)        | III +8.0±0.00<br>(III+8)   | 9.2±0.42<br>(9~10)  | III+22.3±1.16<br>(III+21~24) |
| TBF <sub>3</sub> | 60.3±3.5<br>(55~64)  | 12.8±1.42<br>(11~15)      | 9.6±0.73<br>(9~10)        | III +8.0±0.00<br>(III+8)   | 9.4±0.51<br>(9~10)  | III+22.2±1.06<br>(III+21~24) |
