# Supplementary material for: The subgenomes show asymmetric expression of alleles in hybrid lineages of Megalobrama amblycephala × Culter alburnus
Source: HighWire-hosted journal article supplement (doi:10.1101/gr.249805.119), 2019-10-24
Supplement: Supplemental_Tables.zip [file Supplemental_Table_S22.pdf › Supplemental_Table/Supplemental_Table_S22.pdf]

**Supplemental Table S22. Measurable traits of length and height of body, head and caudal peduncle in the two hybrid lineages and their inbred parents.**

| Fish type        | WL/BL     | BL/BH     | BL/HL     | HL/HH     | CPL/CPH   | BH/HH     |
|------------------|-----------|-----------|-----------|-----------|-----------|-----------|
| BSB              | 1.18±0.02 | 2.36±0.04 | 4.61±0.03 | 1.19±0.06 | 1.04±0.03 | 2.08±0.05 |
| TC               | 1.18±0.03 | 3.97±0.23 | 5.03±0.31 | 2.18±0.27 | 1.17±0.03 | 2.27±0.01 |
| BTF <sub>1</sub> | 1.19±0.01 | 3.33±0.11 | 4.96±0.10 | 1.83±0.54 | 1.37±0.09 | 2.73±0.04 |
| BTF <sub>2</sub> | 1.17±0.02 | 3.34±0.16 | 5.01±0.11 | 1.68±0.09 | 1.50±0.14 | 2.53±0.14 |
| BTF <sub>3</sub> | 1.16±0.02 | 3.26±0.05 | 4.68±0.21 | 1.59±0.06 | 1.28±0.02 | 2.29±0.03 |
| TBF <sub>1</sub> | 1.19±0.02 | 3.47±0.24 | 5.02±0.19 | 1.63±0.21 | 1.40±0.07 | 2.56±0.07 |
| TBF <sub>2</sub> | 1.19±0.02 | 3.31±0.18 | 4.93±0.11 | 1.75±0.07 | 1.51±0.19 | 2.62±0.14 |
| TBF <sub>3</sub> | 1.18±0.04 | 3.22±0.18 | 4.86±0.14 | 1.78±0.05 | 1.53±0.16 | 2.58±0.11 |

SD: Standard Deviation.

WL/BL: average ratios of whole length to body length.

BL/BH: average ratios of body length to body height.

BL/HL: average ratios of body length to head length.

HL/HH: average ratios of head length to head height.

CPL/CPH: average ratios of caudal peduncle length to caudal peduncle height.

BH/HH: average ratios of body height to head height.
