# Supplementary material for: The subgenomes show asymmetric expression of alleles in hybrid lineages of Megalobrama amblycephala × Culter alburnus
Source: HighWire-hosted journal article supplement (doi:10.1101/gr.249805.119), 2019-10-24
Supplement: Supplemental_Tables.zip [file Supplemental_Table_S23.pdf › Supplemental_Table/Supplemental_Table_S23.pdf]

**Supplemental Table S23. Summary of gene clusters related to growth-regulated function.**

| ID in TC<br>allele | ID in BSB<br>allele | Gene number in same gene clusters<br>of TC | Gene number in same gene clusters of<br>BSB | Gene name                                                         |
|--------------------|---------------------|--------------------------------------------|---------------------------------------------|-------------------------------------------------------------------|
| Ery20143           | Mam27029            | 6                                          | 5                                           | fibroblast growth factor receptor 4                               |
| Ery30319           | Mam17225            | 6                                          | 5                                           | fibroblast growth factor receptor 2                               |
| Ery26154           | Mam21884            | 5                                          | 6                                           | pyruvate dehydrogenase kinase isoform 1                           |
| Ery27989           | Mam25638            | 0                                          | 1                                           | ubiquitin thioesterase                                            |
| Ery10020           | Mam13969            | 5                                          | 4                                           | peroxisome proliferator-activated receptor gamma                  |
| Ery15365           | Mam27939            | 6                                          | 7                                           | SLIT-ROBO Rho GTPase activating protein                           |
| Ery02526           | Mam29454            | 2                                          | 3                                           | Bruton agammaglobulinemia tyrosine kinase                         |
| Ery06963           | Mam23118            | 7                                          | 9                                           | tyrosine-protein phosphatase non-receptor type 11                 |
| Ery19527           | Mam26357            | 15                                         | 19                                          | plexin B                                                          |
| Ery29805           | Mam10505            | 4                                          | 5                                           | roundabout, axon guidance receptor 2                              |
| Ery03693           | Mam28437            | 4                                          | 5                                           | roundabout, axon guidance receptor 1                              |
| Ery12531           | Mam11241            | 4                                          | 5                                           | neuropilin 1                                                      |
| Ery08895           | Mam10635            | 1                                          | 2                                           | semaphorin 7                                                      |
| Ery24273           | Mam20630            | 8                                          | 9                                           | integrin beta 3                                                   |
| Ery25916           | Mam06595            | 3                                          | 4                                           | phosphatidylinositol phospholipase C, gamma-2                     |
| Ery22245           | Mam07740            | 8                                          | 9                                           | integrin beta 1                                                   |
| Ery03385           | Mam01279            | 19                                         | 23                                          | Eph receptor A2                                                   |
| Ery25770           | Mam20143            | 2                                          | 3                                           | inhibitor of nuclear factor kappa-B kinase subunit alpha          |
| Ery03980           | Mam00425            | 4                                          | 2                                           | mitogen-activated protein kinase 8/9/10 (c-Jun N-terminal kinase) |
| Ery18665           | Mam15815            | 1                                          | 2                                           | TAK1-binding protein 1                                            |
| Ery04441           | Mam09018            | 5                                          | 4                                           | Notch 1                                                           |
| Ery18297           | Mam30442            | 1                                          | 2                                           | cathepsin K                                                       |
| Ery13053           | Mam17234            | 15                                         | 11                                          | von Willebrand factor                                             |
| Ery26459           | Mam14439            | 4                                          | 1                                           | toll-like receptor 4                                              |
| Ery17497           | Mam22078            | 2                                          | 1                                           | serine/threonine-protein phosphatase 5                            |
| Ery07309           | Mam30746            | 7                                          | 4                                           | serine/threonine-protein phosphatase 2A regulatory subunit B'     |
| Ery09318           | Mam11133            | 3                                          | 4                                           | serine/threonine-protein phosphatase 2A catalytic subunit         |
| Ery29380           | Mam05287            | 7                                          | 8                                           | ribosomal protein S6 kinase alpha-4                               |

|          |          |    |    |                                                                |
|----------|----------|----|----|----------------------------------------------------------------|
| Ery27072 | Mam04501 | 6  | 5  | retinoid X receptor gamma                                      |
| Ery00671 | Mam22682 | 6  | 5  | retinoid X receptor beta                                       |
| Ery29695 | Mam08077 | 3  | 2  | reelin                                                         |
| Ery03835 | Mam07525 | 2  | 1  | Ras-related protein Rap-1A                                     |
| Ery10446 | Mam02643 | 1  | 3  | platelet-derived growth factor receptor beta                   |
| Ery09951 | Mam26844 | 3  | 2  | mitogen-activated protein kinase-activated protein kinase<br>2 |
| Ery21107 | Mam19990 | 5  | 6  | mitogen-activated protein kinase kinase kinase kinase 4        |
| Ery29329 | Mam28289 | 3  | 4  | mitogen-activated protein kinase kinase kinase 3               |
| Ery06334 | Mam18975 | 3  | 4  | mitogen-activated protein kinase kinase kinase 2               |
| Ery00501 | Mam28708 | 2  | 1  | mitogen-activated protein kinase kinase kinase 13              |
| Ery24108 | Mam29061 | 11 | 18 | low density lipoprotein receptor-related protein 5/6           |
| Ery00174 | Mam01443 | 2  | 3  | laminin, gamma 1                                               |
| Ery23010 | Mam01887 | 4  | 6  | laminin, alpha 3/5                                             |
| Ery21517 | Mam00854 | 6  | 7  | klotho                                                         |
| Ery15106 | Mam04004 | 1  | 3  | interleukin 4 receptor                                         |
| Ery20290 | Mam16991 | 1  | 2  | integrin alpha 9                                               |
| Ery02183 | Mam15868 | 1  | 2  | integrin alpha 4                                               |
| Ery03466 | Mam22833 | 6  | 7  | integrin alpha 2                                               |
| Ery14812 | Mam10024 | 6  | 7  | integrin alpha 1                                               |
| Ery17669 | Mam01750 | 6  | 7  | insulin receptor substrate 1                                   |
| Ery14240 | Mam01799 | 4  | 6  | inositol 1,4,5-triphosphate receptor type 3                    |
| Ery03851 | Mam15799 | 4  | 6  | inositol 1,4,5-triphosphate receptor type 1                    |
| Ery15992 | Mam14154 | 1  | 2  | heparin-binding EGF-like growth factor                         |
| Ery26135 | Mam13211 | 14 | 8  | heat shock 70kDa protein 1/2/6/8                               |
| Ery16310 | Mam03943 | 3  | 4  | FMS-like tyrosine kinase 4                                     |
| Ery21167 | Mam11710 | 3  | 4  | FMS-like tyrosine kinase 1                                     |
| Ery25083 | Mam13112 | 2  | 1  | C-C motif chemokine 25                                         |
| Ery29983 | Mam23670 | 14 | 13 | adenylate cyclase 7                                            |
| Ery27058 | Mam22607 | 14 | 13 | adenylate cyclase 6                                            |

---
