# Supplementary material for: The subgenomes show asymmetric expression of alleles in hybrid lineages of Megalobrama amblycephala × Culter alburnus
Source: HighWire-hosted journal article supplement (doi:10.1101/gr.249805.119), 2019-10-24
Supplement: Supplemental_Tables.zip [file Supplemental_Table_S24.pdf › Supplemental_Table/Supplemental_Table_S24.pdf]

**Supplemental Table S24. Summary of 5 growth-regulated genes under positive selection.**

| ID in BSB allele | <i>Ka/Ks</i> | ID in TC allele | Gene name                             |
|------------------|--------------|-----------------|---------------------------------------|
| Mam06636         | 3.97         | Ery08365        | cofilin                               |
| Mam14966         | 1.96         | Ery18205        | transforming growth factor beta-1     |
| Mam24050         | 1.48         | Ery30967        | C-C motif chemokine 20                |
| Mam10377         | 1.22         | Ery30227        | classical protein kinase C alpha type |
| Mam00722         | 1.07         | Ery09366        | C-C motif chemokine 19                |
