# Supplementary material for: The subgenomes show asymmetric expression of alleles in hybrid lineages of Megalobrama amblycephala × Culter alburnus
Source: HighWire-hosted journal article supplement (doi:10.1101/gr.249805.119), 2019-10-24
Supplement: Supplemental_Tables.zip [file Supplemental_Table_S25.pdf › Supplemental_Table/Supplemental_Table_S25.pdf]

**Supplemental Table S25. Global expression in shared BT related to growth-regulated function.**

| ID in BSB<br>allele | ID in TC<br>allele | Gene number in same gene<br>clusters of TC | Gene number in same gene<br>clusters of BSB | Gene name                                                    | Pattern in global<br>expression |
|---------------------|--------------------|--------------------------------------------|---------------------------------------------|--------------------------------------------------------------|---------------------------------|
| Mam05829            | Ery02939           | 6                                          | 6                                           | Janus kinase 1                                               | VIII                            |
| Mam24513            | Ery02225           | 2                                          | 2                                           | transcription factor jun-B                                   | VI                              |
| Mam06631            | Ery16982           | 1                                          | 1                                           | cytochrome b-245, alpha polypeptide                          | VIII                            |
| Mam28585            | Ery11413           | 2                                          | 2                                           | suppressor of cytokine signaling 3                           | VI                              |
| Mam00774            | Ery25259           | 1                                          | 1                                           | mitogen-activated protein kinase kinase<br>kinase 7          | VIII                            |
| Mam01692            | Ery10144           | 3                                          | 3                                           | p21-activated kinase 2                                       | II                              |
| Mam11593            | Ery28002           | 1                                          | 1                                           | proto-oncogene protein c-fos                                 | VII                             |
| Mam02019            | Ery14830           | 3                                          | 3                                           | SHC-transforming protein 2                                   | III                             |
| Mam11133            | Ery09318           | 3                                          | 4                                           | serine/threonine-protein phosphatase 2A<br>catalytic subunit | V                               |
| Mam23542            | Ery15511           | 4                                          | 4                                           | molecular chaperone HtpG                                     | I                               |
| Mam07465            | Ery18925           | 6                                          | 6                                           | mitogen-activated protein kinase kinase<br>kinase kinase 2   | III                             |
| Mam29256            | Ery17174           | 3                                          | 3                                           | mitogen-activated protein kinase kinase<br>kinase 5          | VII                             |
| Mam12018            | Ery11159           | 1                                          | 1                                           | mitogen-activated protein kinase 7                           | no change                       |
| Mam09857            | Ery08642           | 1                                          | 1                                           | insulin-like growth factor 2                                 | VII                             |
| Mam11238            | Ery05072           | 1                                          | 1                                           | heat shock protein beta-1                                    | no change                       |
| Mam00626            | Ery11029           | 4                                          | 4                                           | heat shock protein 90kDa beta                                | V                               |
| Mam28733            | Ery08773           | 1                                          | 1                                           | exocyst complex component 2                                  | VIII                            |
| Mam15777            | Ery15137           | 1                                          | 1                                           | early growth response protein 1                              | V                               |
| Mam01673            | Ery03064           | 1                                          | 1                                           | Bcl-2-like 1 (apoptosis regulator Bcl-X)                     | VIII                            |
