# Supplementary material for: The subgenomes show asymmetric expression of alleles in hybrid lineages of Megalobrama amblycephala × Culter alburnus
Source: HighWire-hosted journal article supplement (doi:10.1101/gr.249805.119), 2019-10-24
Supplement: Supplemental_Tables.zip [file Supplemental_Table_S26.pdf › Supplemental_Table/Supplemental_Table_S26.pdf]

**Supplemental Table S26. Global expression in shared TB related to growth-regulated function.**

| ID in BSB<br>allele | ID in TC<br>allele | Gene number in same gene<br>clusters of TC | Gene number in same gene<br>clusters of BSB | Gene name                                            | Pattern in global<br>expression |
|---------------------|--------------------|--------------------------------------------|---------------------------------------------|------------------------------------------------------|---------------------------------|
| Mam25834            | Ery10717           | 1                                          | 1                                           | fos-like antigen 2                                   | VI                              |
| Mam07861            | Ery00216           | 2                                          | 2                                           | LIM domain kinase 2                                  | VI                              |
| Mam09664            | Ery17401           | 1                                          | 1                                           | serine/threonine-protein kinase 11                   | II                              |
| Mam14526            | Ery25153           | 1                                          | 1                                           | Ras-related protein Rab-5C                           | V                               |
| Mam20470            | Ery05854           | 2                                          | 2                                           | Na (+)/H (+) exchange regulatory cofactor<br>NHE-RF1 | VIII                            |
| Mam00854            | Ery21517           | 6                                          | 7                                           | klotho                                               | X                               |
| Mam06835            | Ery08068           | 4                                          | 4                                           | integrin alpha 5                                     | IX                              |
| Mam11238            | Ery05072           | 1                                          | 1                                           | heat shock protein beta-1                            | no change                       |
| Mam00626            | Ery11029           | 4                                          | 4                                           | heat shock protein 90kDa beta                        | V                               |
| Mam08600            | Ery26446           | 1                                          | 1                                           | GRB2-associated-binding protein 1                    | no change                       |
| Mam15777            | Ery15137           | 1                                          | 1                                           | early growth response protein 1                      | V                               |
| Mam02536            | Ery10967           | 1                                          | 1                                           | cyclic AMP-responsive element-binding<br>protein 3   | VIII                            |
| Mam22607            | Ery27058           | 14                                         | 13                                          | adenylate cyclase 6                                  | XI                              |
