# Supplementary material for: The subgenomes show asymmetric expression of alleles in hybrid lineages of Megalobrama amblycephala × Culter alburnus
Source: HighWire-hosted journal article supplement (doi:10.1101/gr.249805.119), 2019-10-24
Supplement: Supplemental_Tables.zip [file Supplemental_Table_S27.pdf › Supplemental_Table/Supplemental_Table_S27.pdf]

**Supplemental Table S27. Number of *cis*- and *trans*-regulation genes in the growth-regulated genes.**

| Species                   | <i>Cis</i> only<br>(B) <sup>a</sup> | <i>Cis</i> only<br>(T) <sup>a</sup> | <i>Trans</i> only<br>(B) <sup>b</sup> | <i>Trans</i> only<br>(T) <sup>b</sup> | <i>Cis+trans</i><br>(B) <sup>a</sup> | <i>Cis+trans</i><br>(T) <sup>a</sup> | <i>Cis x trans</i><br>(B) <sup>a</sup> | <i>Cis x trans</i><br>(T) <sup>a</sup> | Compensator<br>y (B) <sup>a</sup> | Compensator<br>y (T) <sup>a</sup> | Conser<br>ved | Ambig<br>uous |
|---------------------------|-------------------------------------|-------------------------------------|---------------------------------------|---------------------------------------|--------------------------------------|--------------------------------------|----------------------------------------|----------------------------------------|-----------------------------------|-----------------------------------|---------------|---------------|
| BTF <sub>1</sub> -L       | 8                                   | 1                                   | 37                                    | 37                                    | 34                                   | 1                                    | 26                                     | 4                                      | 8                                 | 1                                 | 34            | 78            |
| BTF <sub>2</sub> -L       | 10                                  | 1                                   | 58                                    | 49                                    | 16                                   | 3                                    | 9                                      | 4                                      | 5                                 | 1                                 | 28            | 85            |
| BTF <sub>3</sub> -L       | 3                                   | 4                                   | 70                                    | 47                                    | 10                                   | 4                                    | 6                                      | 6                                      | 2                                 | 0                                 | 29            | 88            |
| Shared among<br>BT liver  | 0                                   | 0                                   | 30                                    | 26                                    | 7                                    | 0                                    | 4                                      | 1                                      | 1                                 | 0                                 | 14            | 73            |
| TBF <sub>1</sub> -L       | 8                                   | 0                                   | 46                                    | 37                                    | 20                                   | 2                                    | 23                                     | 3                                      | 3                                 | 1                                 | 41            | 85            |
| TBF <sub>2</sub> -L       | 4                                   | 2                                   | 63                                    | 45                                    | 16                                   | 1                                    | 11                                     | 4                                      | 1                                 | 1                                 | 32            | 89            |
| TBF <sub>3</sub> -L       | 1                                   | 2                                   | 70                                    | 53                                    | 9                                    | 2                                    | 7                                      | 9                                      | 1                                 | 1                                 | 27            | 87            |
| Shared among<br>TB liver  | 0                                   | 0                                   | 32                                    | 30                                    | 2                                    | 0                                    | 5                                      | 0                                      | 0                                 | 0                                 | 13            | 80            |
| Shared among<br>all liver | 0                                   | 0                                   | 19                                    | 19                                    | 0                                    | 0                                    | 4                                      | 0                                      | 0                                 | 0                                 | 8             | 69            |

<sup>a</sup> Based on threshold of  $\log_2$  (TC/BSB) < -1 (B) or > 1 (T) in hybrids.

<sup>b</sup> Based on threshold of  $\log_2$  (TC/BSB) < -1 (B) or > 1 (T) in parents.
