# Supplementary figures and images for: The subgenomes show asymmetric expression of alleles in hybrid lineages of Megalobrama amblycephala × Culter alburnus
Source: HighWire-hosted journal article supplement (doi:10.1101/gr.249805.119), 2019-10-24

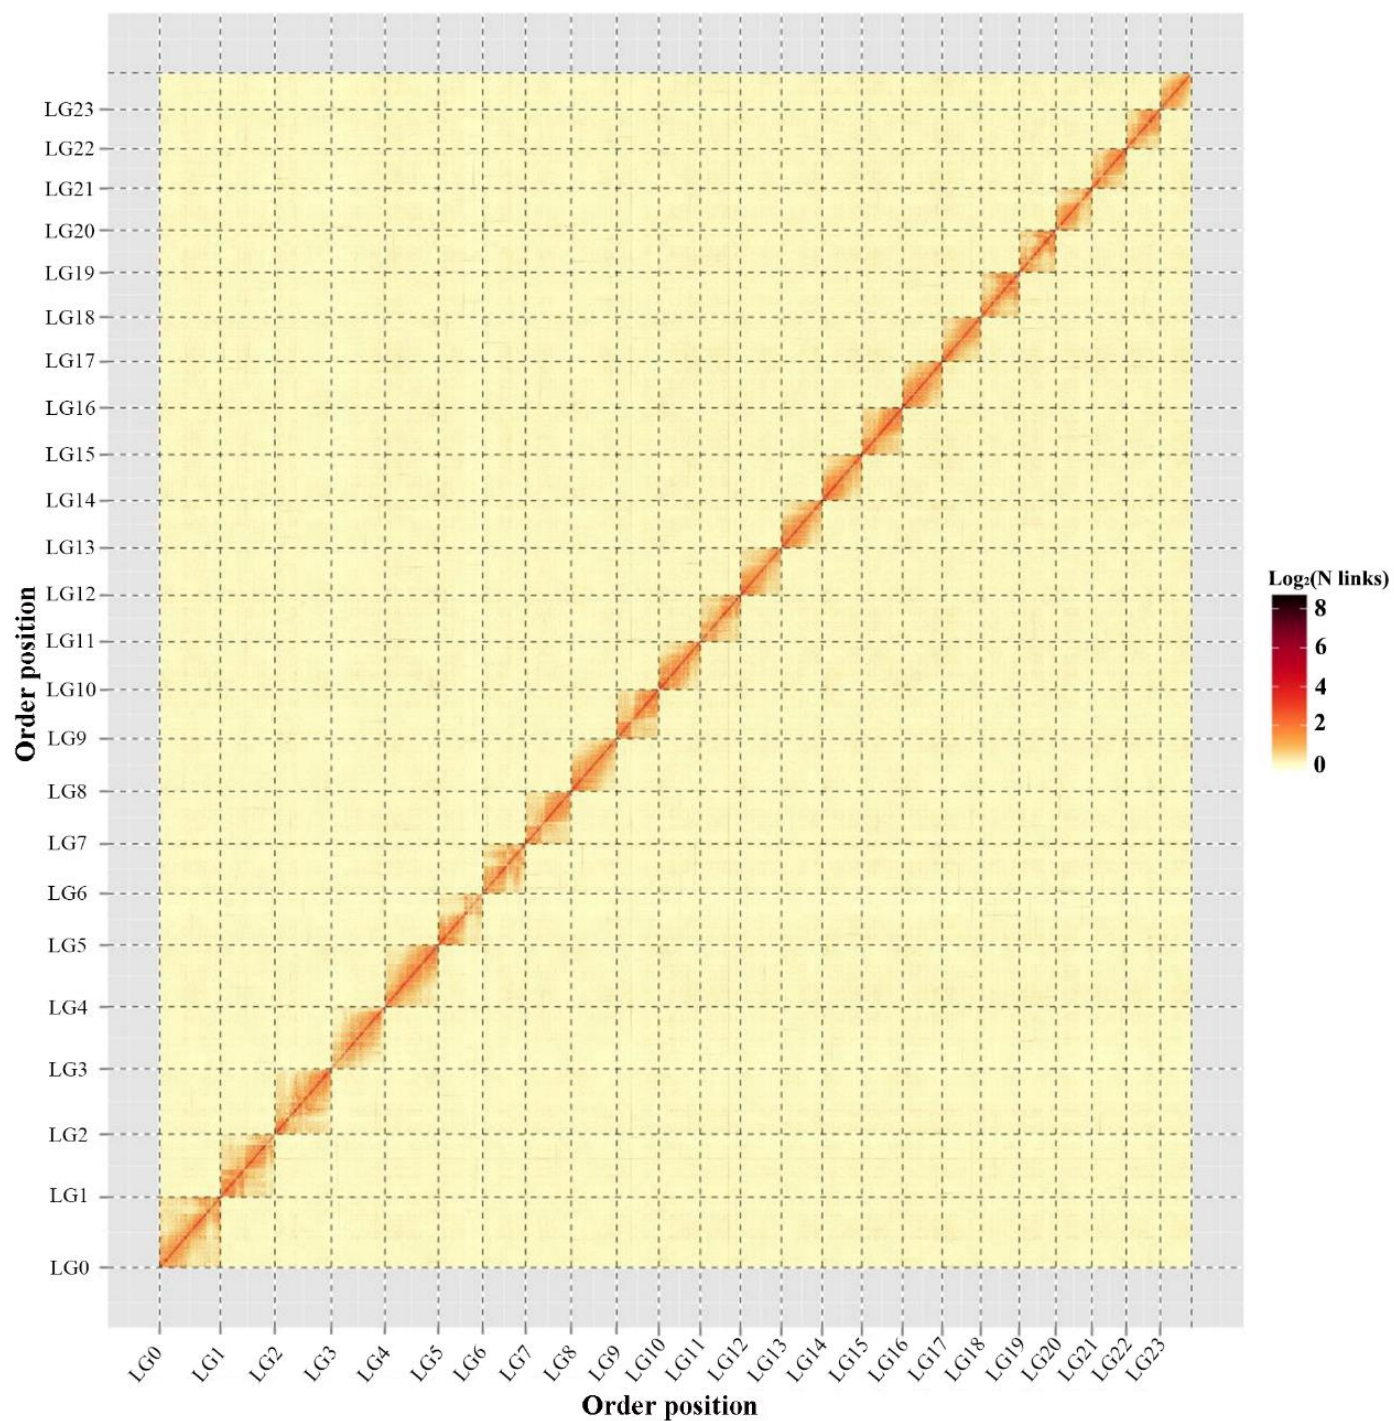

**Supplemental Fig. S2.** Twenty-four representative chromosomes of the BSB Hi-C contact maps.

Supplement: Supplemental_Figures_zip.zip [file Supplemental_Fig_S2.pdf › Supplemental_Figures/Supplemental_Fig_S2.pdf]

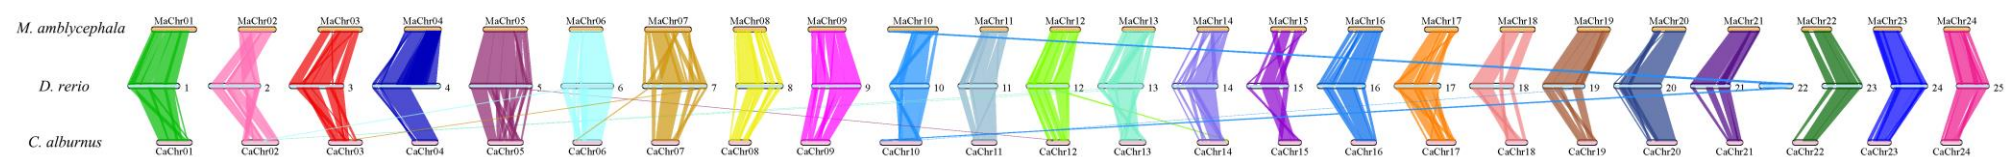

**Supplemental Fig. S4.** Syntenic relationship among BSB (24), *Danio rerio* (25) and TC (24) chromosomes.

Supplement: Supplemental_Figures_zip.zip [file Supplemental_Fig_S4.pdf › Supplemental_Figures/Supplemental_Fig_S4.pdf]
